# Supplementary material
Source: Research Square preprint supplement (doi:10.21203/rs.3.rs-9337426/v1)
Supplement: Supplementary file 1 [file 3777584cf56b0437e82e43fb.pdf]

1 **Supplementary Table 1: Baseline Characteristics by LRS Category**

| Characteristic               | Index Cohort       |                    |                   |         | Validation Cohort  |                       |                       |         |
|------------------------------|--------------------|--------------------|-------------------|---------|--------------------|-----------------------|-----------------------|---------|
|                              | LRS <6             | LRS 6–10           | LRS >10           | P value | LRS <6             | LRS 6–10              | LRS >10               | P value |
| <b>N (% of cohort)</b>       | <b>157 (24.2%)</b> | <b>395 (61.0%)</b> | <b>96 (14.8%)</b> |         | <b>168 (19.0%)</b> | <b>562 (63.6%)</b>    | <b>153 (17.3%)</b>    |         |
| <b>DEMOGRAPHICS</b>          |                    |                    |                   |         |                    |                       |                       |         |
| Age, years                   | 63.9 ± 13.3        | 67.4 ± 11.9**      | 67.2 ± 10.7       | 0.017   | 71.4 ± 12.4        | 74.9 ± 10.2**         | 74.6 ± 9.9            | 0.011   |
| Male sex, n (%)              | 98 (62.4%)         | 326 (82.5%***)     | 81 (84.4%***)     | 0.000   | 73 (43.5%)         | 412 (73.3%***)        | 123 (80.4%***)        | 0.000   |
| BMI, kg/m <sup>2</sup>       | 27.6 ± 5.3         | 27.7 ± 5.1         | 28.8 ± 6.3        | 0.439   | 28.2 ± 6.9         | 29.2 ± 6.0*           | 29.1 ± 6.1            | 0.043   |
| Waist circumference, cm      | --                 | --                 | --                | --      | 98.5 [85.8–108.0]  | 102.0 [95.0–113.0]*** | 103.0 [96.0–115.0]*** | 0.000   |
| Hip circumference, cm        | --                 | --                 | --                | --      | 105.0 [95.0–112.2] | 106.0 [100.0–112.0]   | 105.0 [99.0–113.0]    | 0.404   |
| Waist-to-hip ratio           | --                 | --                 | --                | --      | 0.9 [0.9–1.0]      | 1.0 [0.9–1.0]***      | 1.0 [0.9–1.1]***      | 0.000   |
| Systolic BP, mmHg            | 127.0 ± 23.5       | 124.8 ± 21.0       | 126.9 ± 24.5      | 0.637   | 125.7 ± 22.9       | 126.6 ± 23.2          | 127.2 ± 22.3          | 0.781   |
| Diastolic BP, mmHg           | 76.5 ± 13.8        | 75.0 ± 13.0        | 76.2 ± 14.7       | 0.485   | 70.1 ± 11.7        | 69.3 ± 12.8           | 67.6 ± 12.2           | 0.227   |
| Heart rate, bpm              | 79.5 ± 18.7        | 80.0 ± 18.9        | 90.6 ± 27.9**     | 0.008   | 72.1 ± 13.1        | 72.7 ± 17.7           | 76.4 ± 17.8           | 0.050   |
| NYHA functional class, n (%) |                    |                    |                   |         |                    |                       |                       |         |
| Class I                      | 18 (11.5%)         | 34 (8.6%)          | 2 (2.1%)**        | 0.031   | 4 (2.4%)           | 5 (0.9%)              | 2 (1.3%)              | 0.311   |
| Class II                     | 65 (41.4%)         | 169 (42.8%)        | 42 (43.8%)        | 0.928   | 89 (53.0%)         | 238 (42.3%)*          | 57 (37.3%)**          | 0.012   |
| Class III                    | 45 (28.7%)         | 111 (28.1%)        | 31 (32.3%)        | 0.717   | 67 (39.9%)         | 256 (45.6%)           | 78 (51.0%)            | 0.136   |
| Class IV                     | 4 (2.5%)           | 19 (4.8%)          | 4 (4.2%)          | 0.487   | 8 (4.8%)           | 62 (11.0%)*           | 16 (10.5%)            | 0.052   |
| <b>CONGESTION ASSESSMENT</b> |                    |                    |                   |         |                    |                       |                       |         |

## Supplementary

| Characteristic                         | Index Cohort  |                  |                  |         | Validation Cohort |                  |                    |         |
|----------------------------------------|---------------|------------------|------------------|---------|-------------------|------------------|--------------------|---------|
|                                        | LRS <6        | LRS 6–10         | LRS >10          | P value | LRS <6            | LRS 6–10         | LRS >10            | P value |
| Congestion score (0–3)                 | 0.0 [0.0–0.3] | 0.3 [0.0–1.0]*** | 1.0 [0.3–1.7]*** | 0.000   | --                | --               | --                 | --      |
| Peripheral oedema, n (%)               | 55 (35.0%)    | 182 (46.1%)      | 64 (66.7%)***    | 0.000   | 63 (37.5%)        | 303 (53.9%)***   | 95 (62.1%)***      | 0.000   |
| None                                   | 72 (45.9%)    | 158 (40.0%)      | 22 (22.9%)***    | 0.000   | 78 (46.4%)        | 194 (34.5%)***   | 42 (27.5%)***      | 0.000   |
| Ankle                                  | 41 (26.1%)    | 87 (22.0%)       | 21 (21.9%)       | 0.296   | 40 (23.8%)        | 153 (27.2%)      | 45 (29.4%)         | 0.719   |
| Below knee                             | 10 (6.4%)     | 73 (18.5%)**     | 27 (28.1%)***    | 0.000   | 21 (12.5%)        | 122 (21.7%)*     | 40 (26.1%)**       | 0.014   |
| Above knee                             | 4 (2.5%)      | 22 (5.6%)        | 16 (16.7%)***    | 0.000   | 2 (1.2%)          | 28 (5.0%)*       | 10 (6.5%)*         | 0.063   |
| Jugular venous distention, n (%)       | 16 (10.2%)    | 91 (23.0%)**     | 30 (31.2%)***    | 0.001   | 27 (16.1%)        | 153 (27.2%)**    | 52 (34.0%)***      | 0.001   |
| Hepatomegaly, n (%)                    | 14 (8.9%)     | 85 (21.5%)***    | 26 (27.1%)***    | 0.000   | 2 (1.2%)          | 19 (3.4%)        | 5 (3.3%)           | 0.361   |
| Orthopnoea, n (%)                      | 14 (8.9%)     | 85 (21.5%)***    | 26 (27.1%)***    | 0.000   | --                | --               | --                 | --      |
| Rales/crackles, n (%)                  | 17 (10.8%)    | 53 (13.4%)       | 10 (10.4%)*      | 0.088   | 5 (3.0%)          | 37 (6.6%)***     | 5 (3.3%)**         | 0.000   |
| <b>ECHOCARDIOGRAPHY</b>                |               |                  |                  |         |                   |                  |                    |         |
| LVEF, %                                | 30.4 ± 8.7    | 30.1 ± 10.0      | 29.4 ± 10.0      | 0.785   | 40.1 ± 14.4       | 41.2 ± 13.1      | 41.3 ± 13.1        | 0.813   |
| LVEDD, mm                              | 63.6 ± 9.0    | 62.7 ± 9.4       | 61.3 ± 9.6       | 0.336   | 53.6 ± 10.1       | 55.1 ± 9.3       | 54.8 ± 8.1         | 0.294   |
| Left atrial diameter, mm               | 46.3 ± 7.2    | 49.1 ± 8.2***    | 48.9 ± 7.8       | 0.004   | 43.7 ± 7.8        | 45.7 ± 6.8**     | 45.4 ± 6.6*        | 0.023   |
| IVS thickness, mm                      | 10.0 ± 2.1    | 10.2 ± 2.7       | 10.0 ± 2.2       | 0.901   | 11.6 ± 2.6        | 13.0 ± 5.4**     | 12.3 ± 3.0         | 0.013   |
| Mitral regurgitation, n (%)            | 69 (43.9%)    | 193 (48.9%)      | 38 (39.6%)       | 0.282   | 55 (32.7%)        | 165 (29.4%)      | 48 (31.4%)         | 0.797   |
| Dilated IVC, n (%)                     | --            | --               | --               | --      | 27 (16.1%)        | 106 (18.9%)      | 37 (24.2%)         | 0.199   |
| Right atrial pressure, mmHg            | --            | --               | --               | --      | 7.5 [7.0–10.0]    | 10.0 [7.0–12.5]* | 10.0 [7.5–13.1]**  | 0.008   |
| Tricuspid regurgitation gradient, mmHg | --            | --               | --               | --      | 29.5 [25.8–39.2]  | 33.0 [27.0–41.0] | 36.0 [29.5–47.0]** | 0.005   |

## Supplementary

| Characteristic                            | Index Cohort           |                         |                         |         | Validation Cohort    |                          |                          |         |
|-------------------------------------------|------------------------|-------------------------|-------------------------|---------|----------------------|--------------------------|--------------------------|---------|
|                                           | LRS <6                 | LRS 6–10                | LRS >10                 | P value | LRS <6               | LRS 6–10                 | LRS >10                  | P value |
| Right ventricular systolic pressure, mmHg | --                     | --                      | --                      | --      | 38.8 [33.0–50.4]     | 45.0 [36.0–54.6]**       | 46.5 [39.0–60.4]***      | 0.001   |
| <b>LFTS &amp; LIVER NITS</b>              |                        |                         |                         |         |                      |                          |                          |         |
| ALT, U/L                                  | 20.0 [15.0–26.5]       | 26.0 [18.0–39.5]***     | 41.5 [25.0–99.0]***     | 0.000   | 19.0 [15.0–24.2]     | 22.0 [17.0–32.0]***      | 34.0 [22.0–47.0]***      | 0.000   |
| AST, U/L                                  | 21.0 [17.0–25.0]       | 26.0 [20.0–34.0]***     | 38.0 [26.0–77.0]***     | 0.000   | 20.0 [16.0–24.0]     | 23.0 [18.0–30.0]***      | 32.0 [21.0–45.0]***      | 0.000   |
| Platelet count, ×10 <sup>9</sup> /L       | 255.4 ± 79.5           | 210.2 ± 69.2***         | 205.0 ± 73.3***         | 0.000   | 293.2 ± 94.7         | 235.9 ± 89.2***          | 224.2 ± 88.4***          | 0.000   |
| GGT, U/L                                  | 27.0 [17.0–36.0]       | 61.0 [31.0–101.0]***    | 189.0 [98.0–338.2]***   | 0.000   | 26.0 [18.0–35.2]     | 45.0 [28.0–74.0]***      | 124.0 [53.0–273.0]***    | 0.000   |
| Alkaline phosphatase, U/L                 | 74.0 [58.0–101.0]      | 87.0 [69.0–117.0]***    | 131.0 [91.0–193.0]***   | 0.000   | 83.5 [67.8–100.2]    | 86.0 [71.0–109.0]*       | 112.0 [79.0–157.0]***    | 0.000   |
| Total bilirubin, μmol/L                   | 11.7 [8.1–15.8]        | 14.0 [10.3–20.4]***     | 19.3 [13.7–29.4]***     | 0.000   | 9.0 [6.0–12.0]       | 10.0 [7.0–15.0]***       | 13.0 [8.0–18.0]***       | 0.000   |
| Albumin, g/L                              | 32.9 ± 9.1             | 32.1 ± 8.8              | 30.9 ± 7.4              | 0.195   | 39.5 ± 4.9           | 37.6 ± 5.9***            | 36.2 ± 6.2***            | 0.000   |
| FIB-4 index                               | 1.2 [0.8–1.7]          | 1.6 [1.2–2.4]***        | 2.3 [1.3–3.9]***        | 0.000   | 1.2 [0.9–1.6]        | 1.7 [1.2–2.4]***         | 2.2 [1.4–3.1]***         | 0.000   |
| Hepatic steatosis index                   | 36.9 ± 6.3             | 38.1 ± 7.2              | 39.9 ± 7.9**            | 0.020   | 37.6 ± 8.1           | 38.9 ± 7.7*              | 40.2 ± 8.3**             | 0.005   |
| <b>LABORATORY VALUES</b>                  |                        |                         |                         |         |                      |                          |                          |         |
| NT-proBNP, ng/L                           | 2664.0 [1415.5–6780.0] | 4919.5 [2372.8–9372.0]* | 4182.0 [2995.0–9354.5]* | 0.055   | 609.0 [263.0–1674.0] | 1328.0 [555.0–3173.2]*** | 2285.0 [657.0–6060.0]*** | 0.000   |
| Creatinine, μmol/L                        | 91.0 [77.3–106.1]      | 105.2 [88.0–129.5]***   | 116.3 [89.2–141.4]***   | 0.000   | 86.0 [72.8–111.0]    | 97.0 [82.0–128.0]***     | 100.0 [82.0–132.0]***    | 0.000   |
| eGFR, mL/min/1.73m <sup>2</sup>           | 75.3 ± 23.4            | 64.4 ± 22.6***          | 60.2 ± 24.7***          | 0.000   | 65.7 ± 22.0          | 61.0 ± 25.4**            | 60.3 ± 22.2*             | 0.023   |

## Supplementary

| Characteristic                           | Index Cohort     |                      |                      |         | Validation Cohort |                    |                     |         |
|------------------------------------------|------------------|----------------------|----------------------|---------|-------------------|--------------------|---------------------|---------|
|                                          | LRS <6           | LRS 6–10             | LRS >10              | P value | LRS <6            | LRS 6–10           | LRS >10             | P value |
| Haemoglobin, g/dL                        | 13.3 ± 1.9       | 13.4 ± 2.0           | 13.6 ± 1.9           | 0.622   | 16.9 ± 21.1       | 15.4 ± 16.9        | 13.9 ± 10.6         | 0.169   |
| Sodium, mmol/L                           | 140.4 ± 3.0      | 139.5 ± 3.9*         | 136.8 ± 5.2***       | 0.000   | 139.1 ± 3.6       | 139.3 ± 3.3        | 138.0 ± 3.3***      | 0.000   |
| <b>COMORBIDITIES, n (%)</b>              |                  |                      |                      |         |                   |                    |                     |         |
| Diabetes mellitus                        | 25 (15.9%)       | 142 (35.9%)***       | 53 (55.2%)***        | 0.000   | 13 (7.7%)         | 155 (27.6%)***     | 97 (63.4%)***       | 0.000   |
| Hypertension                             | 95 (60.5%)       | 245 (62.0%)          | 53 (55.2%)           | 0.471   | 84 (50.0%)        | 323 (57.5%)        | 99 (64.7%)*         | 0.028   |
| Atrial fibrillation                      | 42 (26.8%)       | 182 (46.1%)***       | 47 (49.0%)***        | 0.000   | 66 (39.3%)        | 265 (47.2%)        | 73 (47.7%)          | 0.163   |
| Prior myocardial infarction              | 44 (28.0%)       | 143 (36.2%)          | 38 (39.6%)           | 0.106   | 66 (39.3%)        | 277 (49.3%)*       | 76 (49.7%)          | 0.060   |
| Prior stroke                             | 9 (5.7%)         | 36 (9.1%)            | 7 (7.3%)             | 0.402   | 15 (8.9%)         | 108 (19.2%)**      | 36 (23.5%)***       | 0.002   |
| COPD                                     | 27 (17.2%)       | 62 (15.7%)           | 16 (16.7%)           | 0.903   | 28 (16.7%)        | 81 (14.4%)         | 24 (15.7%)          | 0.734   |
| Chronic kidney disease                   | 25 (15.9%)       | 118 (29.9%)**        | 36 (37.5%)***        | 0.000   | 61 (36.3%)        | 249 (44.3%)        | 71 (46.4%)          | 0.105   |
| <b>HEART FAILURE MEDICATIONS</b>         |                  |                      |                      |         |                   |                    |                     |         |
| ACE inhibitor/ARB, n (%)                 | 112 (71.3%)      | 227 (57.5%)**        | 59 (61.5%)           | 0.010   | 126 (75.0%)       | 410 (73.0%)        | 112 (73.2%)         | 0.869   |
| ACEi/ARB % of target dose, mean ± SD     | 49.1 ± 41.8      | 46.6 ± 39.0          | 53.1 ± 38.7          | 0.359   | 42.1 ± 27.0       | 46.0 ± 31.3        | 47.3 ± 30.5         | 0.545   |
| Beta-blocker, n (%)                      | 119 (75.8%)      | 281 (71.1%)          | 60 (62.5%)*          | 0.077   | 127 (75.6%)       | 402 (71.5%)        | 111 (72.5%)         | 0.585   |
| Beta-blocker % of target dose, mean ± SD | 26.7 ± 20.2      | 29.6 ± 22.6          | 32.3 ± 23.4          | 0.327   | 47.1 ± 31.8       | 46.4 ± 32.6        | 51.8 ± 30.8         | 0.134   |
| Loop diuretic, n (%)                     | 151 (96.2%)      | 386 (97.7%)          | 92 (95.8%)           | 0.462   | 164 (97.6%)       | 547 (97.3%)        | 150 (98.0%)         | 0.879   |
| Dose, mg/day (furosemide equiv.)         | 40.0 [40.0–60.0] | 40.0 [40.0–100.0]*** | 80.0 [40.0–141.2]*** | 0.000   | 40.0 [40.0–40.0]  | 40.0 [40.0–50.0]** | 40.0 [40.0–80.0]*** | 0.000   |
| MRA, n (%)                               | 85 (54.1%)       | 200 (50.6%)          | 45 (46.9%)           | 0.524   | 57 (33.9%)        | 188 (33.5%)        | 50 (32.7%)          | 0.972   |

Supplementary

| Characteristic                       | Index Cohort     |                  |                  |         | Validation Cohort |                  |                  |         |
|--------------------------------------|------------------|------------------|------------------|---------|-------------------|------------------|------------------|---------|
|                                      | LRS <6           | LRS 6–10         | LRS >10          | P value | LRS <6            | LRS 6–10         | LRS >10          | P value |
| Dose, mg/day (spironolactone equiv.) | 25.0 [25.0–25.0] | 25.0 [25.0–50.0] | 25.0 [25.0–50.0] | 0.232   | 25.0 [25.0–25.0]  | 25.0 [25.0–25.0] | 25.0 [25.0–25.0] | 0.108   |

Table 1: Baseline Characteristics Stratified by LiverRisk Score Category | Index cohort N=157 | Validation cohort N=168

Values presented as mean ± SD, median [IQR], or n (%)

\* P<0.05, \*\* P<0.01, \*\*\* P<0.001 vs LRS <6 reference group (pairwise comparisons)

Overall P values from Kruskal-Wallis test (continuous) or Chi-square/Fisher's exact test (categorical)

Right heart parameters and anthropometrics available for Validation cohort only

3 **Supplementary Table 2: Baseline Characteristics by HSI Category**

| Characteristic               | Index Cohort       |                    |                    |         | Validation Cohort  |                       |                        |         |
|------------------------------|--------------------|--------------------|--------------------|---------|--------------------|-----------------------|------------------------|---------|
|                              | HSI <30            | HSI 30–36          | HSI >36            | P value | HSI <30            | HSI 30–36             | HSI >36                | P value |
| <b>N (% of cohort)</b>       | <b>198 (12.8%)</b> | <b>507 (32.8%)</b> | <b>839 (54.3%)</b> |         | <b>189 (11.4%)</b> | <b>474 (28.6%)</b>    | <b>993 (60.0%)</b>     |         |
| <b>DEMOGRAPHICS</b>          |                    |                    |                    |         |                    |                       |                        |         |
| Age, years                   | 72.6 ± 11.8        | 70.2 ± 11.8**      | 66.0 ± 11.6***     | 0.000   | 78.4 ± 10.4        | 75.5 ± 10.4***        | 71.6 ± 10.3***         | 0.000   |
| Male sex, n (%)              | 153 (77.3%)        | 388 (76.5%)        | 611 (72.8%)        | 0.208   | 136 (72.0%)        | 327 (69.0%)           | 648 (65.3%)            | 0.116   |
| BMI, kg/m <sup>2</sup>       | 21.6 ± 2.4         | 25.3 ± 2.4***      | 30.8 ± 5.0***      | 0.000   | 21.5 ± 2.4         | 25.2 ± 2.6***         | 32.6 ± 5.7***          | 0.000   |
| Waist circumference, cm      | --                 | --                 | --                 | --      | 90.0 [83.0–97.0]   | 96.0 [90.0–103.0]***  | 109.0 [101.0–118.0]*** | 0.000   |
| Hip circumference, cm        | --                 | --                 | --                 | --      | 94.5 [90.0–100.0]  | 102.0 [95.0–107.0]*** | 110.0 [104.0–118.0]*** | 0.000   |
| Waist-to-hip ratio           | --                 | --                 | --                 | --      | 0.9 [0.9–1.0]      | 1.0 [0.9–1.0]         | 1.0 [0.9–1.1]***       | 0.000   |
| Systolic BP, mmHg            | 122.3 ± 21.9       | 123.8 ± 21.7       | 126.8 ± 21.8**     | 0.001   | 124.4 ± 23.7       | 123.5 ± 21.7          | 127.7 ± 22.2*          | 0.002   |
| Diastolic BP, mmHg           | 72.7 ± 12.0        | 73.8 ± 13.1        | 76.6 ± 13.6***     | 0.000   | 66.8 ± 12.9        | 68.5 ± 12.6           | 70.5 ± 13.2***         | 0.000   |
| Heart rate, bpm              | 78.7 ± 19.4        | 79.7 ± 20.0        | 81.7 ± 20.0        | 0.038   | 73.0 ± 16.0        | 73.2 ± 16.3           | 74.5 ± 17.1            | 0.171   |
| NYHA functional class, n (%) |                    |                    |                    |         |                    |                       |                        |         |
| Class I                      | 16 (8.1%)          | 42 (8.3%)          | 63 (7.5%)          | 0.869   | 2 (1.1%)           | 6 (1.3%)              | 8 (0.8%)               | 0.696   |
| Class II                     | 87 (43.9%)         | 228 (45.0%)        | 395 (47.1%)        | 0.622   | 63 (33.3%)         | 211 (44.5%)*          | 426 (42.9%)*           | 0.025   |
| Class III                    | 67 (33.8%)         | 158 (31.2%)        | 218 (26.0%)*       | 0.029   | 88 (46.6%)         | 200 (42.2%)           | 435 (43.8%)            | 0.584   |
| Class IV                     | 4 (2.0%)           | 15 (3.0%)          | 42 (5.0%)          | 0.057   | 36 (19.0%)         | 57 (12.0%)*           | 123 (12.4%)*           | 0.033   |
| <b>CONGESTION ASSESSMENT</b> |                    |                    |                    |         |                    |                       |                        |         |
| Congestion score (0–3)       | 0.3 [0.0–1.0]      | 0.3 [0.0–1.0]      | 0.3 [0.0–1.0]      | 0.366   | --                 | --                    | --                     | --      |

## Supplementary

| Characteristic                            | Index Cohort |             |              |         | Validation Cohort |                  |                  |         |
|-------------------------------------------|--------------|-------------|--------------|---------|-------------------|------------------|------------------|---------|
|                                           | HSI <30      | HSI 30–36   | HSI >36      | P value | HSI <30           | HSI 30–36        | HSI >36          | P value |
| Peripheral oedema, n (%)                  | 87 (43.9%)   | 245 (48.3%) | 418 (49.8%)  | 0.166   | 88 (46.6%)        | 228 (48.1%)      | 574 (57.8%)**    | 0.000   |
| None                                      | 82 (41.4%)   | 186 (36.7%) | 286 (34.1%)  | 0.166   | 76 (40.2%)        | 196 (41.4%)      | 312 (31.4%)**    | 0.000   |
| Ankle                                     | 50 (25.3%)   | 131 (25.8%) | 187 (22.3%)  | 0.347   | 47 (24.9%)        | 115 (24.3%)      | 282 (28.4%)      | 0.201   |
| Below knee                                | 31 (15.7%)   | 84 (16.6%)  | 173 (20.6%)  | 0.061   | 34 (18.0%)        | 86 (18.1%)       | 240 (24.2%)      | 0.014   |
| Above knee                                | 6 (3.0%)     | 30 (5.9%)   | 58 (6.9%)    | 0.103   | 7 (3.7%)          | 27 (5.7%)        | 52 (5.2%)        | 0.621   |
| Jugular venous distention, n (%)          | 42 (21.2%)   | 121 (23.9%) | 172 (20.5%)  | 0.122   | 60 (31.7%)        | 127 (26.8%)      | 242 (24.4%)      | 0.382   |
| Hepatomegaly, n (%)                       | 29 (14.6%)   | 83 (16.4%)  | 131 (15.6%)  | 0.850   | 5 (2.6%)          | 25 (5.3%)        | 31 (3.1%)        | 0.105   |
| Orthopnoea, n (%)                         | 29 (14.6%)   | 83 (16.4%)  | 131 (15.6%)  | 0.850   | --                | --               | --               | --      |
| Rales/crackles, n (%)                     | 29 (14.6%)   | 60 (11.8%)  | 101 (12.0%)  | 0.395   | 10 (5.3%)         | 23 (4.9%)        | 53 (5.3%)        | 0.366   |
| <b>ECHOCARDIOGRAPHY</b>                   |              |             |              |         |                   |                  |                  |         |
| LVEF, %                                   | 30.4 ± 10.5  | 30.7 ± 10.8 | 30.8 ± 10.3  | 0.838   | 39.1 ± 15.1       | 39.1 ± 13.3      | 41.5 ± 13.5      | 0.017   |
| LVEDD, mm                                 | 60.7 ± 10.7  | 61.2 ± 10.4 | 62.5 ± 9.3*  | 0.052   | 53.1 ± 11.1       | 54.4 ± 9.0       | 55.7 ± 9.1*      | 0.053   |
| Left atrial diameter, mm                  | 46.3 ± 8.9   | 47.9 ± 8.2  | 48.3 ± 7.3** | 0.004   | 43.9 ± 7.5        | 44.9 ± 7.4       | 45.9 ± 7.1**     | 0.008   |
| IVS thickness, mm                         | 10.4 ± 2.5   | 10.2 ± 2.3  | 10.6 ± 2.5   | 0.064   | 12.8 ± 7.0        | 12.0 ± 3.1       | 12.6 ± 3.9       | 0.024   |
| Mitral regurgitation, n (%)               | 100 (50.5%)  | 256 (50.5%) | 386 (46.0%)  | 0.239   | 81 (42.9%)        | 171 (36.1%)      | 255 (25.7%)***   | 0.000   |
| Dilated IVC, n (%)                        | --           | --          | --           | --      | 43 (22.8%)        | 96 (20.3%)       | 173 (17.4%)      | 0.167   |
| Right atrial pressure, mmHg               | --           | --          | --           | --      | 10.0 [7.5–15.0]   | 10.0 [7.0–12.5]  | 10.0 [7.0–12.5]  | 0.531   |
| Tricuspid regurgitation gradient, mmHg    | --           | --          | --           | --      | 35.0 [29.0–43.0]  | 33.2 [26.0–43.0] | 33.0 [26.0–41.0] | 0.199   |
| Right ventricular systolic pressure, mmHg | --           | --          | --           | --      | 45.0 [38.0–56.0]  | 44.5 [35.8–56.5] | 43.0 [35.0–53.5] | 0.203   |
| <b>LFTS &amp; LIVER NITS</b>              |              |             |              |         |                   |                  |                  |         |

## Supplementary

| Characteristic                      | Index Cohort            |                          |                           |         | Validation Cohort      |                          |                          |         |
|-------------------------------------|-------------------------|--------------------------|---------------------------|---------|------------------------|--------------------------|--------------------------|---------|
|                                     | HSI <30                 | HSI 30–36                | HSI >36                   | P value | HSI <30                | HSI 30–36                | HSI >36                  | P value |
| ALT, U/L                            | 17.0 [13.0–25.0]        | 21.0 [15.0–30.6]***      | 29.0 [20.0–45.0]***       | 0.000   | 18.0 [14.0–26.0]       | 20.5 [16.0–29.0]**       | 24.0 [18.0–35.0]***      | 0.000   |
| AST, U/L                            | 27.0 [21.0–36.8]        | 25.0 [20.0–34.1]         | 25.0 [19.0–34.5]**        | 0.007   | 26.0 [21.0–38.0]       | 24.0 [20.0–33.0]*        | 22.0 [17.0–29.0]***      | 0.000   |
| Platelet count, ×10 <sup>9</sup> /L | 219.1 ± 76.0            | 223.8 ± 93.7             | 225.9 ± 74.8              | 0.135   | 241.7 ± 100.3          | 243.9 ± 92.0             | 247.8 ± 91.7             | 0.114   |
| GGT, U/L                            | 51.5 [28.0–97.0]        | 50.0 [25.0–94.0]         | 56.0 [29.0–111.0]         | 0.095   | 38.0 [23.0–113.2]      | 43.0 [23.8–86.8]         | 47.0 [29.0–87.0]         | 0.023   |
| Alkaline phosphatase, U/L           | 88.5 [64.8–119.5]       | 84.0 [64.7–116.0]        | 83.0 [64.0–117.0]         | 0.818   | 93.0 [74.0–129.0]      | 89.0 [69.0–116.8]        | 89.0 [71.0–114.0]        | 0.216   |
| Total bilirubin, µmol/L             | 13.7 [9.2–23.8]         | 14.0 [10.0–22.0]         | 13.6 [9.4–20.0]           | 0.187   | 11.0 [7.0–16.0]        | 11.0 [8.0–16.0]          | 10.0 [7.0–14.0]**        | 0.000   |
| Albumin, g/L                        | 30.8 ± 8.7              | 31.6 ± 9.1               | 32.1 ± 8.4                | 0.156   | 36.9 ± 6.5             | 38.2 ± 6.2*              | 38.0 ± 5.8*              | 0.089   |
| LiverRisk Score                     | 6.7 [5.9–7.7]           | 7.0 [6.0–8.2]            | 7.2 [6.1–9.2]*            | 0.044   | 7.2 [6.0–8.9]          | 6.9 [6.2–8.4]            | 7.4 [6.4–9.1]            | 0.016   |
| FIB-4 index                         | 2.4 [1.7–3.4]           | 1.9 [1.3–2.6]***         | 1.4 [1.0–2.0]***          | 0.000   | 2.3 [1.6–3.2]          | 1.8 [1.3–2.5]***         | 1.4 [1.0–1.9]***         | 0.000   |
| <b>OTHER LABORATORY VALUES</b>      |                         |                          |                           |         |                        |                          |                          |         |
| NT-proBNP, ng/L                     | 7055.5 [3662.0–12418.8] | 5459.5 [2762.0–10184.8]* | 3636.0 [2153.8–7061.5]*** | 0.000   | 2907.0 [1318.8–7699.5] | 1777.0 [667.0–3964.2]*** | 1023.0 [393.0–2613.0]*** | 0.000   |
| Creatinine, µmol/L                  | 106.0 [87.0–128.0]      | 105.0 [84.0–132.6]       | 99.0 [83.1–126.0]         | 0.187   | 103.0 [82.0–135.0]     | 98.0 [79.2–124.0]        | 96.0 [79.0–122.0]        | 0.149   |
| eGFR, mL/min/1.73m <sup>2</sup>     | 62.6 ± 22.4             | 62.9 ± 23.3              | 67.3 ± 23.0*              | 0.001   | 57.2 ± 22.8            | 60.4 ± 23.3              | 62.7 ± 25.2**            | 0.007   |
| Haemoglobin, g/dL                   | 12.8 ± 1.7              | 13.2 ± 1.9*              | 13.4 ± 1.9***             | 0.000   | 16.2 ± 20.3            | 14.6 ± 13.6*             | 14.5 ± 13.1***           | 0.001   |
| Sodium, mmol/L                      | 138.7 ± 4.3             | 139.2 ± 4.0              | 139.5 ± 4.0*              | 0.035   | 137.5 ± 9.9            | 139.0 ± 3.3**            | 139.1 ± 3.3***           | 0.002   |

## Supplementary

| Characteristic                           | Index Cohort     |                  |                  |         | Validation Cohort |                  |                    |         |
|------------------------------------------|------------------|------------------|------------------|---------|-------------------|------------------|--------------------|---------|
|                                          | HSI <30          | HSI 30–36        | HSI >36          | P value | HSI <30           | HSI 30–36        | HSI >36            | P value |
| <b>COMORBIDITIES, n (%)</b>              |                  |                  |                  |         |                   |                  |                    |         |
| Diabetes mellitus                        | 16 (8.1%)        | 123 (24.3%)*     | 360 (42.9%)*     | 0.000   | 17 (9.0%)         | 96 (20.3%)*      | 421 (42.4%)*       | 0.000   |
| Hypertension                             | 104 (52.5%)      | 307 (60.6%)      | 561 (66.9%)*     | 0.000   | 81 (42.9%)        | 259 (54.6%)*     | 633 (63.7%)*       | 0.000   |
| Atrial fibrillation                      | 85 (42.9%)       | 230 (45.4%)      | 369 (44.0%)      | 0.811   | 90 (47.6%)        | 204 (43.0%)      | 437 (44.0%)        | 0.588   |
| Prior myocardial infarction              | 67 (33.8%)       | 189 (37.3%)      | 293 (34.9%)      | 0.589   | 93 (49.2%)        | 241 (50.8%)      | 482 (48.5%)        | 0.719   |
| Prior stroke                             | 14 (7.1%)        | 56 (11.0%)       | 66 (7.9%)        | 0.089   | 41 (21.7%)        | 89 (18.8%)       | 154 (15.5%)*       | 0.063   |
| COPD                                     | 42 (21.2%)       | 86 (17.0%)       | 139 (16.6%)      | 0.290   | 30 (15.9%)        | 74 (15.6%)       | 181 (18.2%)        | 0.382   |
| Chronic kidney disease                   | 54 (27.3%)       | 153 (30.2%)      | 215 (25.6%)      | 0.192   | 97 (51.3%)        | 214 (45.1%)      | 434 (43.7%)        | 0.125   |
| <b>HEART FAILURE MEDICATIONS</b>         |                  |                  |                  |         |                   |                  |                    |         |
| ACE inhibitor/ARB, n (%)                 | 122 (61.6%)      | 314 (61.9%)      | 519 (61.9%)      | 0.997   | 122 (64.6%)       | 338 (71.3%)      | 732 (73.7%)*       | 0.034   |
| ACEi/ARB % of target dose, mean ± SD     | 40.9 ± 26.8      | 45.8 ± 36.6      | 51.1 ± 39.7      | 0.053   | 38.9 ± 32.6       | 41.0 ± 29.8      | 48.3 ± 32.0        | 0.000   |
| Beta-blocker, n (%)                      | 151 (76.3%)      | 367 (72.4%)      | 591 (70.4%)      | 0.247   | 132 (69.8%)       | 350 (73.8%)      | 737 (74.2%)        | 0.453   |
| Beta-blocker % of target dose, mean ± SD | 31.9 ± 21.8      | 33.0 ± 25.1      | 31.5 ± 24.7      | 0.392   | 38.7 ± 27.7       | 44.6 ± 30.9      | 49.6 ± 32.8        | 0.000   |
| Loop diuretic, n (%)                     | 193 (97.5%)      | 491 (96.8%)      | 822 (98.0%)      | 0.431   | 186 (98.4%)       | 467 (98.5%)      | 958 (96.5%)        | 0.047   |
| Dose, mg/day (furosemide equiv.)         | 40.0 [40.0–80.0] | 40.0 [40.0–80.0] | 40.0 [40.0–80.0] | 0.357   | 40.0 [40.0–60.0]  | 40.0 [40.0–50.0] | 40.0 [40.0–57.5]   | 0.607   |
| MRA, n (%)                               | 84 (42.4%)       | 247 (48.7%)      | 412 (49.1%)      | 0.226   | 55 (29.1%)        | 137 (28.9%)      | 357 (36.0%)        | 0.012   |
| Dose, mg/day (spironolactone equiv.)     | 25.0 [25.0–50.0] | 25.0 [25.0–50.0] | 25.0 [25.0–25.0] | 0.418   | 25.0 [25.0–25.0]  | 25.0 [25.0–25.0] | 25.0 [25.0–25.0]** | 0.006   |

Table 1: Baseline Characteristics Stratified by HSI Category | Index cohort N=198 | Validation cohort N=189

Supplementary

| Characteristic | Index Cohort |           |         |         | Validation Cohort |           |         |         |
|----------------|--------------|-----------|---------|---------|-------------------|-----------|---------|---------|
|                | HSI <30      | HSI 30–36 | HSI >36 | P value | HSI <30           | HSI 30–36 | HSI >36 | P value |

Values presented as mean ± SD, median [IQR], or n (%)

\* P<0.05, \*\* P<0.01, \*\*\* P<0.001 vs HSI <30 reference group (pairwise comparisons)

Overall P values from Kruskal-Wallis test (continuous) or Chi-square/Fisher's exact test (categorical)

4

5

6 **Supplementary Table 3: baseline differences between patients with LRS and FIB-4 available**

| Characteristic               | Index Cohort  |               |              | Validation Cohort |              |              |
|------------------------------|---------------|---------------|--------------|-------------------|--------------|--------------|
|                              | LRS Cohort    | FIB-4 Cohort  | P value      | LRS Cohort        | FIB-4 Cohort | P value      |
| <b>N</b>                     | <b>648</b>    | <b>1336</b>   |              | <b>883</b>        | <b>1681</b>  |              |
| <b>DEMOGRAPHICS</b>          |               |               |              |                   |              |              |
| Age, years                   | 66.5 ± 12.1   | 68.5 ± 12.1   | <b>0.000</b> | 74.2 ± 10.7       | 73.6 ± 10.7  | 0.105        |
| Male sex, n (%)              | 505 (77.9%)   | 983 (73.6%)   | <b>0.041</b> | 608 (68.9%)       | 1123 (66.8%) | 0.313        |
| BMI, kg/m <sup>2</sup>       | 27.8 ± 5.3    | 27.7 ± 5.3    | 0.664        | 29.0 ± 6.2        | 29.2 ± 6.4   | 0.340        |
| Systolic BP, mmHg            | 125.6 ± 22.2  | 125.7 ± 22.4  | 0.980        | 126.6 ± 23.0      | 126.1 ± 22.4 | 0.819        |
| Diastolic BP, mmHg           | 75.5 ± 13.4   | 75.3 ± 13.6   | 0.618        | 69.2 ± 12.5       | 69.4 ± 13.0  | 0.597        |
| Heart rate, bpm              | 81.4 ± 20.8   | 81.3 ± 20.4   | 0.992        | 73.2 ± 17.0       | 74.0 ± 16.9  | 0.207        |
| NYHA functional class, n (%) |               |               |              |                   |              |              |
| Class I                      | 54 (8.3%)     | 108 (8.1%)    | 0.918        | 11 (1.2%)         | 16 (1.0%)    | 0.624        |
| Class II                     | 276 (42.6%)   | 584 (43.7%)   | 0.672        | 384 (43.5%)       | 710 (42.2%)  | 0.563        |
| Class III                    | 187 (28.9%)   | 395 (29.6%)   | 0.785        | 401 (45.4%)       | 735 (43.7%)  | 0.431        |
| Class IV                     | 27 (4.2%)     | 56 (4.2%)     | 1.000        | 86 (9.7%)         | 219 (13.0%)  | <b>0.018</b> |
| <b>CONGESTION ASSESSMENT</b> |               |               |              |                   |              |              |
| Congestion score (0–3)       | 0.3 [0.0–1.0] | 0.3 [0.0–1.0] | 0.679        | --                | --           | --           |
| Peripheral oedema, n (%)     |               |               |              |                   |              |              |
| None                         | 252 (38.9%)   | 465 (34.8%)   | 0.092        | 314 (35.6%)       | 589 (35.0%)  | 0.646        |
| Ankle                        | 149 (23.0%)   | 312 (23.4%)   | 0.826        | 238 (27.0%)       | 455 (27.1%)  | 0.939        |
| Below knee                   | 110 (17.0%)   | 267 (20.0%)   | 0.098        | 183 (20.7%)       | 363 (21.6%)  | 0.757        |
| Above knee                   | 42 (6.5%)     | 87 (6.5%)     | 1.000        | 40 (4.5%)         | 87 (5.2%)    | 0.579        |

## Supplementary

| Characteristic                              | Index Cohort      |                   |              | Validation Cohort |                   |         |
|---------------------------------------------|-------------------|-------------------|--------------|-------------------|-------------------|---------|
|                                             | LRS Cohort        | FIB-4 Cohort      | P value      | LRS Cohort        | FIB-4 Cohort      | P value |
| Jugular venous distention, n (%)            | 137 (21.1%)       | 292 (21.9%)       | 0.509        | 232 (26.3%)       | 432 (25.7%)       | 0.649   |
| Hepatomegaly, n (%)                         | 125 (19.3%)       | 219 (16.4%)       | 0.128        | 26 (2.9%)         | 62 (3.7%)         | 0.479   |
| Orthopnoea, n (%)                           | 125 (19.3%)       | 219 (16.4%)       | 0.128        | --                | --                | --      |
| Rales/crackles, n (%)                       | 80 (12.3%)        | 172 (12.9%)       | 0.544        | 47 (5.3%)         | 90 (5.4%)         | 0.997   |
| <b>ECHOCARDIOGRAPHY</b>                     |                   |                   |              |                   |                   |         |
| LVEF, %                                     | 30.1 ± 9.7        | 31.1 ± 10.9       | 0.117        | 33.8 ± 15.7       | 35.6 ± 16.0       | 0.411   |
| LVEDD, mm                                   | 62.7 ± 9.4        | 61.2 ± 9.8        | <b>0.001</b> | 54.7 ± 9.3        | 54.9 ± 9.3        | 0.466   |
| Left atrial diameter, mm                    | 48.3 ± 8.0        | 47.8 ± 7.9        | 0.218        | 45.3 ± 7.0        | 45.3 ± 7.3        | 0.782   |
| IVS thickness, mm                           | 10.1 ± 2.5        | 10.5 ± 2.6        | <b>0.007</b> | 12.6 ± 4.6        | 12.4 ± 4.2        | 0.409   |
| Mitral regurgitation, n (%)                 | 300 (46.3%)       | 634 (47.5%)       | 0.490        | 268 (30.4%)       | 511 (30.4%)       | 0.971   |
| <b>LIVER FUNCTION &amp; FIBROSIS SCORES</b> |                   |                   |              |                   |                   |         |
| ALT, U/L                                    | 25.0 [17.0–40.0]  | 25.0 [16.0–37.2]  | 0.251        | 22.0 [17.0–33.0]  | 22.0 [17.0–32.0]  | 0.858   |
| AST, U/L                                    | 25.0 [19.0–35.0]  | 25.1 [20.0–35.0]  | 0.696        | 23.0 [18.0–31.0]  | 23.0 [18.0–31.0]  | 0.583   |
| Platelet count, ×10 <sup>9</sup> /L         | 220.4 ± 75.0      | 225.5 ± 88.9      | 0.358        | 244.8 ± 93.2      | 245.8 ± 92.5      | 0.697   |
| GGT, U/L                                    | 54.1 [28.0–107.0] | 57.0 [28.0–111.0] | 0.330        | 43.0 [25.0–84.0]  | 45.0 [26.0–90.0]  | 0.215   |
| Alkaline phosphatase, U/L                   | 87.0 [67.0–122.5] | 86.0 [64.8–120.3] | 0.498        | 88.0 [71.0–113.0] | 89.0 [71.0–116.0] | 0.363   |
| Total bilirubin, µmol/L                     | 13.7 [10.1–20.5]  | 13.7 [9.6–20.5]   | 0.687        | 10.0 [7.0–15.0]   | 10.0 [7.0–15.0]   | 0.943   |
| Albumin, g/L                                | 32.1 ± 8.7        | 31.6 ± 8.7        | 0.227        | 37.7 ± 5.8        | 37.8 ± 6.0        | 0.459   |
| FIB-4 index                                 | 1.5 [1.1–2.3]     | 1.7 [1.1–2.4]     | 0.072        | 1.6 [1.1–2.3]     | 1.6 [1.1–2.3]     | 0.720   |
| Hepatic steatosis index                     | 38.1 ± 7.2        | 37.7 ± 7.3        | 0.165        | 38.9 ± 7.9        | 39.1 ± 8.0        | 0.573   |

## Supplementary

| Characteristic                           | Index Cohort           |                        |              | Validation Cohort     |                       |         |
|------------------------------------------|------------------------|------------------------|--------------|-----------------------|-----------------------|---------|
|                                          | LRS Cohort             | FIB-4 Cohort           | P value      | LRS Cohort            | FIB-4 Cohort          | P value |
| <b>OTHER LABORATORY VALUES</b>           |                        |                        |              |                       |                       |         |
| NT-proBNP, ng/L                          | 4159.0 [2189.5–8939.0] | 4752.0 [2578.2–8779.2] | 0.253        | 1239.5 [479.5–3089.0] | 1323.0 [496.0–3412.0] | 0.420   |
| Creatinine, $\mu\text{mol/L}$            | 99.9 [84.0–126.8]      | 101.0 [84.0–128.0]     | 0.776        | 95.0 [79.5–124.0]     | 97.0 [79.0–124.0]     | 0.672   |
| eGFR, mL/min/1.73m <sup>2</sup>          | 66.4 $\pm$ 23.7        | 65.1 $\pm$ 23.3        | 0.264        | 61.7 $\pm$ 24.3       | 61.4 $\pm$ 24.6       | 0.614   |
| Haemoglobin, g/dL                        | 13.4 $\pm$ 1.9         | 13.2 $\pm$ 1.9         | 0.148        | 15.4 $\pm$ 17.0       | 14.8 $\pm$ 14.4       | 0.651   |
| Sodium, mmol/L                           | 139.3 $\pm$ 4.1        | 139.3 $\pm$ 4.1        | 0.901        | 139.0 $\pm$ 3.4       | 138.9 $\pm$ 4.6       | 0.673   |
| Glucose, mmol/L                          | 6.0 [5.1–7.6]          | 6.3 [5.3–7.9]          | <b>0.013</b> | 6.2 [5.2–8.3]         | 6.2 [5.2–8.4]         | 0.451   |
| Cholesterol, mmol/L                      | 4.2 $\pm$ 1.3          | 4.3 $\pm$ 1.3          | 0.585        | 3.6 $\pm$ 9.9         | 3.9 $\pm$ 14.7        | 0.602   |
| <b>COMORBIDITIES, n (%)</b>              |                        |                        |              |                       |                       |         |
| Diabetes mellitus                        | 220 (34.0%)            | 425 (31.8%)            | 0.367        | 265 (30.0%)           | 538 (32.0%)           | 0.343   |
| Hypertension                             | 393 (60.6%)            | 849 (63.5%)            | 0.229        | 506 (57.3%)           | 984 (58.5%)           | 0.551   |
| Atrial fibrillation                      | 271 (41.8%)            | 603 (45.1%)            | 0.178        | 404 (45.8%)           | 742 (44.1%)           | 0.464   |
| Prior myocardial infarction              | 225 (34.7%)            | 472 (35.3%)            | 0.829        | 419 (47.5%)           | 824 (49.0%)           | 0.458   |
| Prior stroke                             | 52 (8.0%)              | 119 (8.9%)             | 0.568        | 159 (18.0%)           | 291 (17.3%)           | 0.694   |
| COPD                                     | 105 (16.2%)            | 222 (16.6%)            | 0.867        | 133 (15.1%)           | 289 (17.2%)           | 0.189   |
| Chronic kidney disease                   | 179 (27.6%)            | 368 (27.5%)            | 1.000        | 381 (43.1%)           | 757 (45.0%)           | 0.482   |
| <b>HEART FAILURE MEDICATIONS</b>         |                        |                        |              |                       |                       |         |
| ACE inhibitor/ARB, n (%)                 | 398 (61.4%)            | 813 (60.9%)            | 0.847        | 648 (73.4%)           | 1204 (71.6%)          | 0.368   |
| ACEi/ARB % of target dose, mean $\pm$ SD | 29.6 $\pm$ 39.0        | 29.0 $\pm$ 37.4        | 0.921        | 33.4 $\pm$ 32.9       | 32.3 $\pm$ 33.6       | 0.272   |

## Supplementary

| Characteristic                           | Index Cohort      |                  |         | Validation Cohort |                  |         |
|------------------------------------------|-------------------|------------------|---------|-------------------|------------------|---------|
|                                          | LRS Cohort        | FIB-4 Cohort     | P value | LRS Cohort        | FIB-4 Cohort     | P value |
| Beta-blocker, n (%)                      | 460 (71.0%)       | 947 (70.9%)      | 1.000   | 640 (72.5%)       | 1235 (73.5%)     | 0.625   |
| Beta-blocker % of target dose, mean ± SD | 20.7 ± 22.9       | 23.0 ± 25.6      | 0.175   | 34.3 ± 34.6       | 34.4 ± 34.2      | 0.940   |
| Loop diuretic, n (%)                     | 629 (97.1%)       | 1302 (97.5%)     | 0.724   | 861 (97.5%)       | 1636 (97.3%)     | 0.881   |
| Dose, mg/day (furosemide equiv.)         | 40.0 [40.0–100.0] | 40.0 [40.0–80.0] | 0.379   | 40.0 [40.0–50.0]  | 40.0 [40.0–50.0] | 0.338   |
| MRA, n (%)                               | 330 (50.9%)       | 629 (47.1%)      | 0.119   | 295 (33.4%)       | 555 (33.0%)      | 0.876   |
| Dose, mg/day (spironolactone equiv.)     | 25.0 [25.0–50.0]  | 25.0 [25.0–50.0] | 0.533   | 25.0 [25.0–25.0]  | 25.0 [25.0–25.0] | 0.518   |

*Supplementary Table: Baseline Characteristics of Cox Proportional Hazards Analysis Cohorts*

*Values presented as mean ± SD, median [IQR], or n (%)*

*P values: Wilcoxon rank-sum test (continuous) or Chi-square/Fisher's exact test (categorical)*

*Significant p-values: p<0.001 (dark red), p<0.01 (orange), p<0.05 (blue)*

*Note: Cohorts overlap - patients with both LRS and FIB-4 appear in both columns*

7

8

9 **Supplementary Table 4: Sensitivity analysis for outcomes – Complete cases with FIB-4 and LRS (FIB-4)**

10

**FIB-4**

|                                 | Index Cohort |             |         | Validation Cohort |             |           | Combined Cohort |             |           |
|---------------------------------|--------------|-------------|---------|-------------------|-------------|-----------|-----------------|-------------|-----------|
|                                 | HR           | 95% CI      | p-value | HR                | 95% CI      | p-value   | HR              | 95% CI      | p-value   |
| <b>Mortality</b>                |              |             |         |                   |             |           |                 |             |           |
| Unadjusted                      | 1.90         | (1.18-3.06) | 0.008** | 1.84              | (1.27-2.67) | 0.001**   | 1.88            | (1.40-2.51) | <0.001*** |
| NT-proBNP                       | 1.76         | (1.09-2.84) | 0.020*  | 1.30              | (0.89-1.90) | 0.168     | 1.49            | (1.11-2.00) | 0.008**   |
| Age + Sex                       | 1.14         | (0.67-1.93) | 0.634   | 1.23              | (0.83-1.83) | 0.312     | 1.25            | (0.91-1.71) | 0.163     |
| Age + Sex + NT-proBNP           | 1.05         | (0.62-1.77) | 0.866   | 1.02              | (0.69-1.52) | 0.904     | 1.09            | (0.79-1.49) | 0.602     |
| Age + Sex + NT-proBNP + Alcohol | 1.07         | (0.63-1.82) | 0.792   | 1.05              | (0.70-1.56) | 0.816     | 1.11            | (0.81-1.52) | 0.518     |
| <b>Composite Outcome</b>        |              |             |         |                   |             |           |                 |             |           |
| Unadjusted                      | 1.68         | (1.14-2.47) | 0.008** | 1.74              | (1.26-2.38) | <0.001*** | 1.71            | (1.34-2.19) | <0.001*** |
| NT-proBNP                       | 1.50         | (1.02-2.21) | 0.039*  | 1.25              | (0.91-1.73) | 0.175     | 1.35            | (1.06-1.73) | 0.017*    |
| Age + Sex                       | 1.22         | (0.80-1.88) | 0.358   | 1.34              | (0.96-1.88) | 0.090     | 1.33            | (1.02-1.72) | 0.035*    |
| Age + Sex + NT-proBNP           | 1.10         | (0.72-1.69) | 0.655   | 1.10              | (0.78-1.54) | 0.584     | 1.13            | (0.87-1.47) | 0.367     |
| Age + Sex + NT-proBNP + Alcohol | 1.11         | (0.72-1.70) | 0.629   | 1.14              | (0.81-1.60) | 0.454     | 1.15            | (0.89-1.50) | 0.285     |

Sensitivity Analysis - FIB-4 (Category: >2.67 vs Reference)

Index: N=548 (Mort=143, Comp=214) | Val: N=743 (Mort=212, Comp=299) | Combined: N=1291 (Mort=355, Comp=513)

\*\*\* p<0.001, \*\* p<0.01, \* p<0.05 | NT-proBNP = P16860 (NPX) | Alcohol = Current\_Alcohol

11 **Supplementary Table 5: Sensitivity analysis for outcomes – Complete cases with FIB-4 and LRS (LRS)**12 **LRS**

|                                 | Index Cohort |             |           | Validation Cohort |             |           | Combined Cohort |             |           |
|---------------------------------|--------------|-------------|-----------|-------------------|-------------|-----------|-----------------|-------------|-----------|
|                                 | HR           | 95% CI      | p-value   | HR                | 95% CI      | p-value   | HR              | 95% CI      | p-value   |
| <b>Mortality</b>                |              |             |           |                   |             |           |                 |             |           |
| Unadjusted                      | 2.65         | (1.50-4.70) | <0.001*** | 3.13              | (1.97-4.99) | <0.001*** | 2.98            | (2.09-4.27) | <0.001*** |
| NT-proBNP                       | 1.98         | (1.11-3.53) | 0.021*    | 1.93              | (1.20-3.13) | 0.007**   | 1.98            | (1.37-2.86) | <0.001*** |
| Age + Sex                       | 2.21         | (1.23-3.98) | 0.008**   | 3.10              | (1.91-5.03) | <0.001*** | 2.66            | (1.84-3.86) | <0.001*** |
| Age + Sex + NT-proBNP           | 1.58         | (0.87-2.88) | 0.136     | 2.01              | (1.22-3.33) | 0.006**   | 1.81            | (1.23-2.65) | 0.002**   |
| Age + Sex + NT-proBNP + Alcohol | 1.68         | (0.92-3.09) | 0.092     | 2.09              | (1.26-3.44) | 0.004**   | 1.92            | (1.31-2.82) | <0.001*** |
| <b>Composite Outcome</b>        |              |             |           |                   |             |           |                 |             |           |
| Unadjusted                      | 2.12         | (1.34-3.36) | 0.001**   | 2.59              | (1.75-3.83) | <0.001*** | 2.41            | (1.79-3.23) | <0.001*** |
| NT-proBNP                       | 1.49         | (0.93-2.38) | 0.100     | 1.73              | (1.16-2.59) | 0.007**   | 1.64            | (1.21-2.22) | 0.001**   |
| Age + Sex                       | 1.90         | (1.18-3.04) | 0.008**   | 2.68              | (1.78-4.03) | <0.001*** | 2.28            | (1.68-3.09) | <0.001*** |
| Age + Sex + NT-proBNP           | 1.32         | (0.81-2.14) | 0.267     | 1.86              | (1.22-2.83) | 0.004**   | 1.59            | (1.16-2.18) | 0.004**   |
| Age + Sex + NT-proBNP + Alcohol | 1.34         | (0.82-2.18) | 0.244     | 1.90              | (1.25-2.89) | 0.003**   | 1.66            | (1.21-2.27) | 0.002**   |

Sensitivity Analysis - LRS (Category: >10 vs Reference)

Index: N=548 (Mort=143, Comp=214) | Val: N=743 (Mort=212, Comp=299) | Combined: N=1291 (Mort=355, Comp=513)

\*\*\* p<0.001, \*\* p<0.01, \* p<0.05 | NT-proBNP = P16860 (NPX) | Alcohol = Current\_Alcohol

14 **Supplementary Table 6: Standardised regression coefficient per log increase in NT-pro BNP**

|                                                           | Index Cohort              |                |         | Validation Cohort         |                |         |
|-----------------------------------------------------------|---------------------------|----------------|---------|---------------------------|----------------|---------|
|                                                           | Std. $\beta$ (95% CI)     | R <sup>2</sup> | p-value | Std. $\beta$ (95% CI)     | R <sup>2</sup> | p-value |
| <b>Univariate</b>                                         |                           |                |         |                           |                |         |
| Log (LRS)                                                 | 0.426 (0.323 to 0.529)    | 9.4%           | <0.001  | 0.396 (0.298 to 0.494)    | 7.0%           | <0.001  |
| Log (FIB-4)                                               | 0.333 (0.258 to 0.407)    | 5.6%           | <0.001  | 0.339 (0.266 to 0.412)    | 4.9%           | <0.001  |
| Log (HSI)                                                 | -0.241 (-0.309 to -0.173) | 3.0%           | <0.001  | -0.383 (-0.455 to -0.310) | 6.3%           | <0.001  |
| <b>Adjusted for age, sex, current alcohol consumption</b> |                           |                |         |                           |                |         |
| Log (LRS)                                                 | 0.403 (0.298 to 0.507)    | 8.3%           | <0.001  | 0.365 (0.265 to 0.464)    | 6.0%           | <0.001  |
| Log (FIB-4)                                               | 0.227 (0.145 to 0.309)    | 2.2%           | <0.001  | 0.212 (0.134 to 0.290)    | 1.8%           | <0.001  |
| Log (HSI)                                                 | -0.173 (-0.242 to -0.104) | 1.5%           | <0.001  | -0.289 (-0.364 to -0.213) | 3.5%           | <0.001  |

15

16 Relationship between liver scores and NT-pro BNP

17 Across both cohorts, log liver fibrosis scores were significantly associated with log NT-pro BNP, with log HSI showing a significant negative  
 18 association with log NT-pro BNP in both univariate and multi-variate analysis. LRS showed the strongest association with log NT-pro BNP with  
 19 a standardised  $\beta$ -estimate of 0.403 [95% CI (0.298 to 0.507);  $p < 0.001$ ] in the index cohort and 0.365 [95% CI (0.265 to 0.464);  $p < 0.001$ ] in the  
 20 validation cohort after adjustment for age, sex, and current alcohol consumption.

21

22 **Supplementary Table 7: Paired comparison of liver scores at baseline and 9-month follow-up**

23

| Score | N   | Median (IQR)        |                     | Change             | Direction change, n (%) |             | p-value |
|-------|-----|---------------------|---------------------|--------------------|-------------------------|-------------|---------|
|       |     | Baseline            | Follow-up (9m)      |                    | Increased               | Decreased   |         |
| LRS   | 152 | 6.51 (5.65-7.39)    | 6.26 (5.57-7.35)    | -0.03 (-0.69-0.74) | 72 (47.4%)              | 80 (52.6%)  | 0.764   |
| FIB-4 | 413 | 1.54 (1.08-2.27)    | 1.53 (1.09-2.16)    | -0.00 (-0.43-0.32) | 206 (49.9%)             | 207 (50.1%) | 0.423   |
| HSI   | 582 | 37.08 (32.68-41.70) | 36.31 (32.24-41.11) | -0.10 (-1.90-1.43) | 271 (46.6%)             | 301 (51.7%) | 0.084   |

*Wilcoxon signed-rank test*\*\*\*  $p < 0.001$ , \*\*  $p < 0.01$ , \*  $p < 0.05$ 

24

Enriched Pathways by Database – FIB4

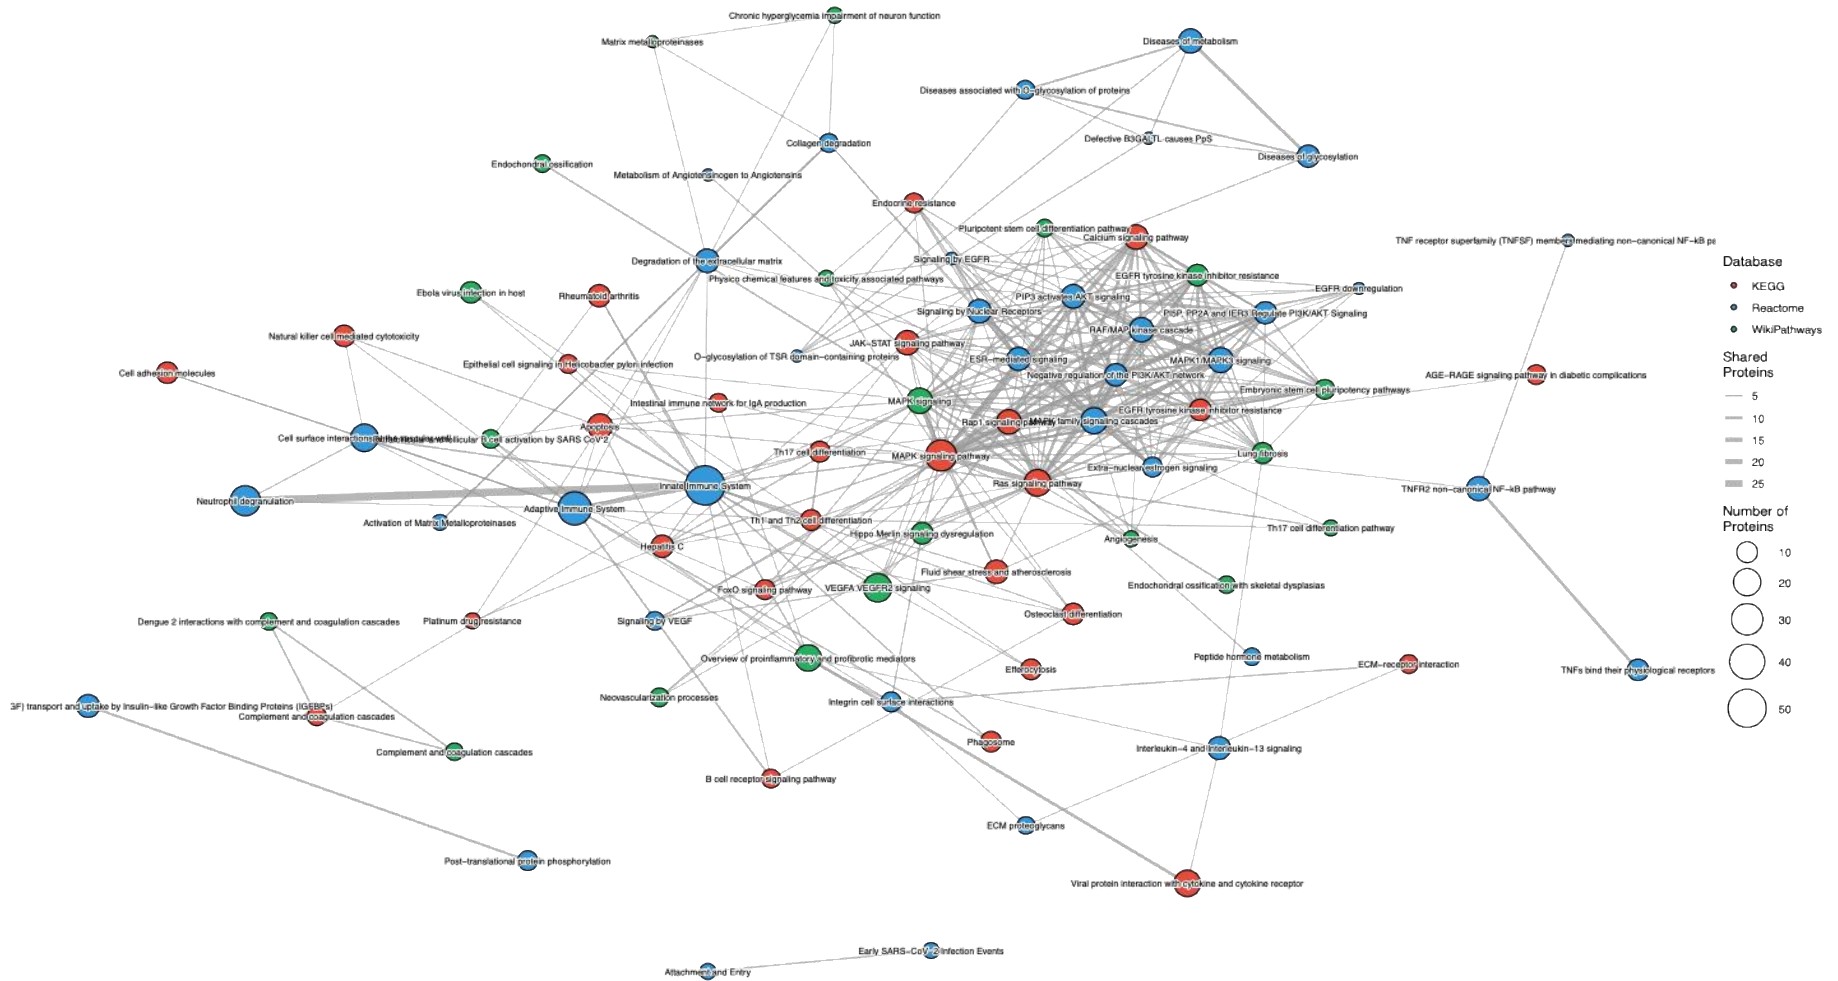

25

26

27 **Supplementary Figure 1: Network graph showing shared proteins between significant pathways in liver fibrosis (FIB-4) (KEGG, Reactome, WP)**

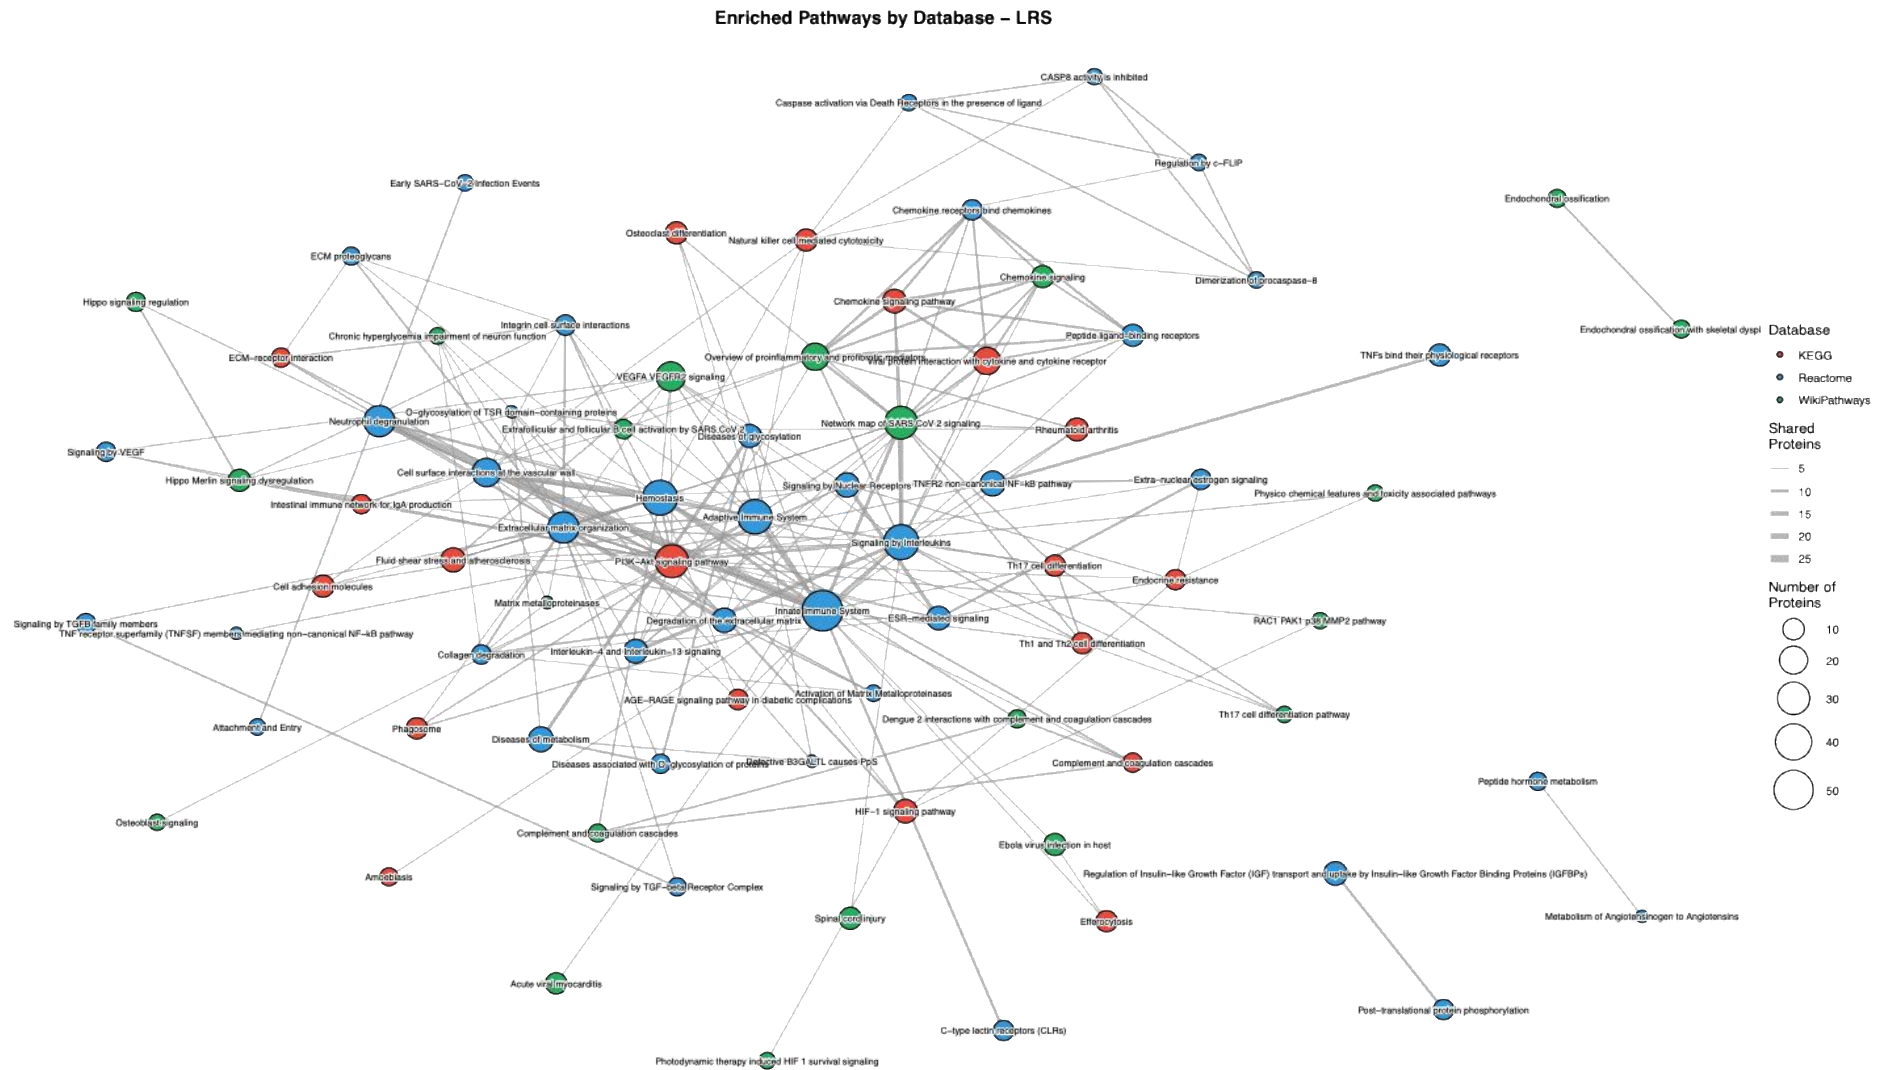

28  
29  
30

**Supplementary Figure 2: Network graph showing shared proteins between significant pathways in liver fibrosis (LiverRisk) (KEGG, Reactome, WP)**

A

Pathway Crosstalk - LRS (Index)

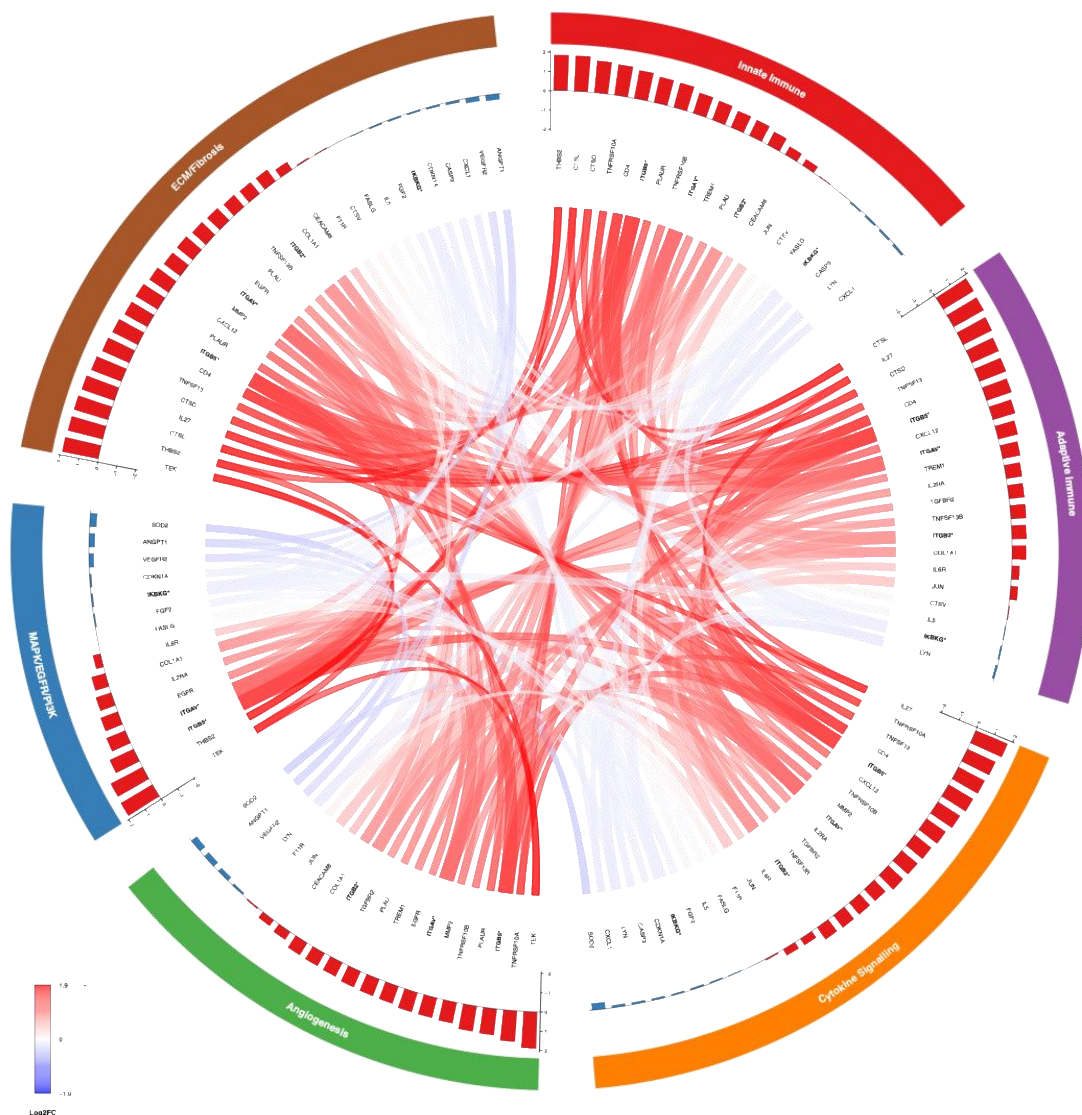

B

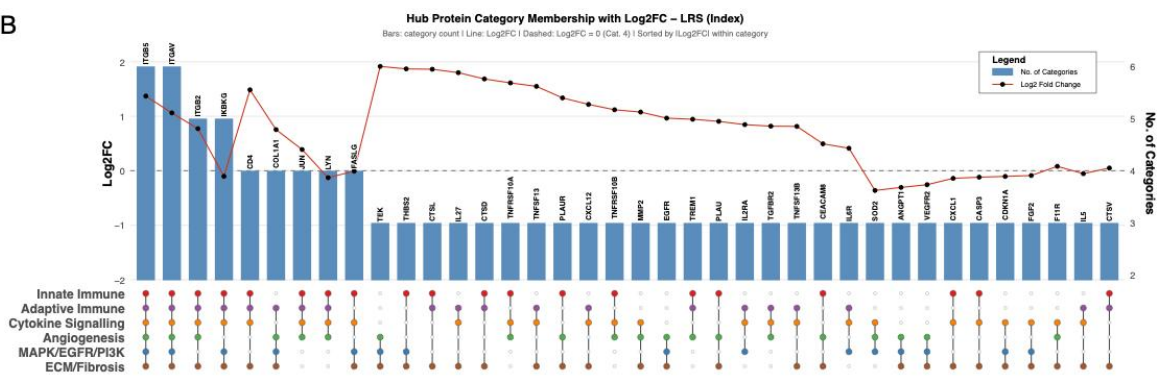

31  
 32 **Supplementary Figure 3:** (A) Chord diagram of biomarkers contributing to pathways in three or  
 33 more biological categories with Log2 FC plotted on concentric bar plot. (B) UpSet plot showing  
 34 number of different categories each biomarker contributes to with Log2 FC

35

A

Pathway Crosstalk – Steatotic Fibrosis (Pooled, N=932)

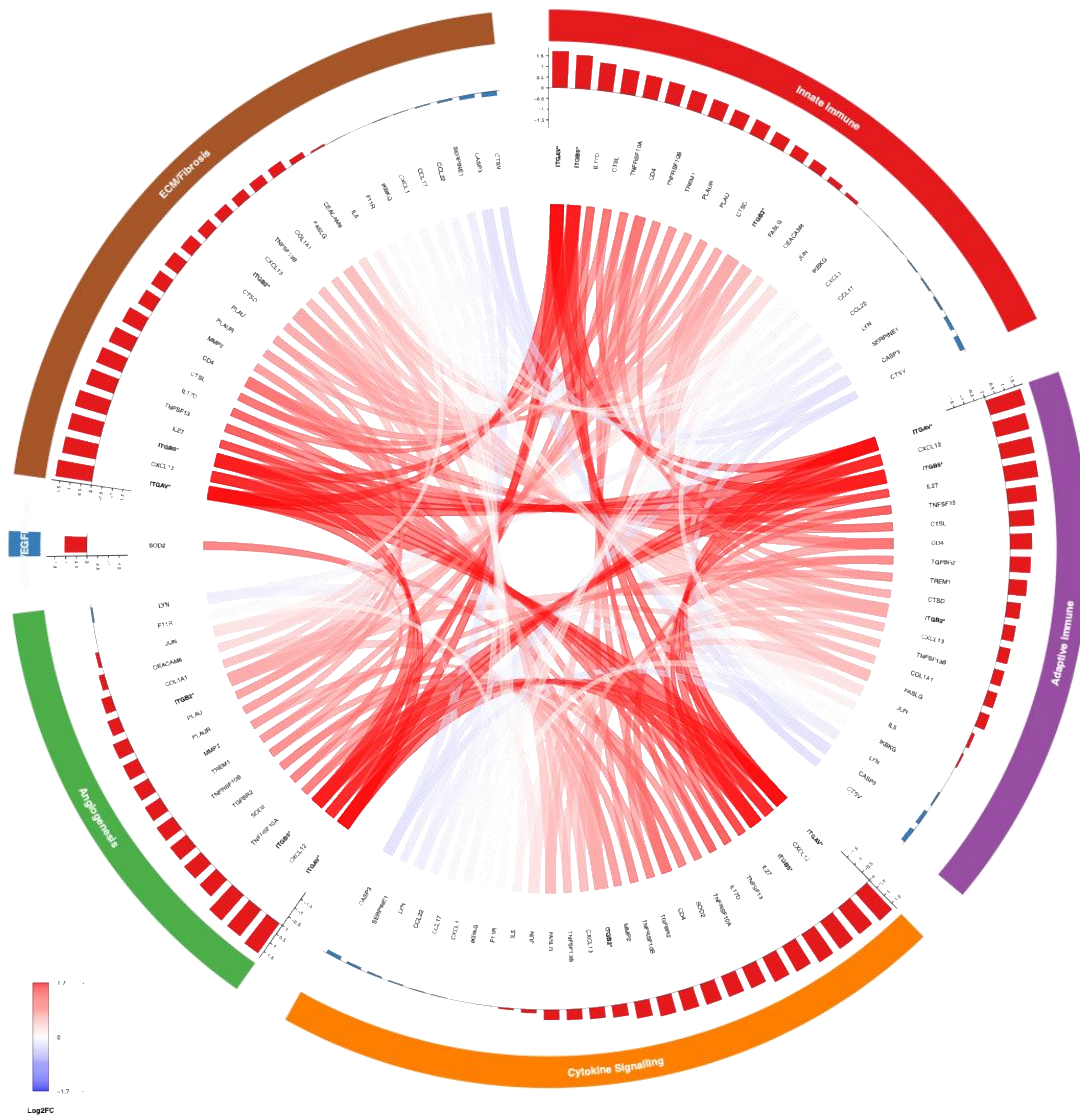

B

Hub Protein Category Membership with Log2FC – Steatotic Fibrosis (Pooled, N=932)

Bars: category count | Line: Log2FC | Dashed: Log2FC = 0 (Cat. 4) | Sorted by |Log2FC| within category

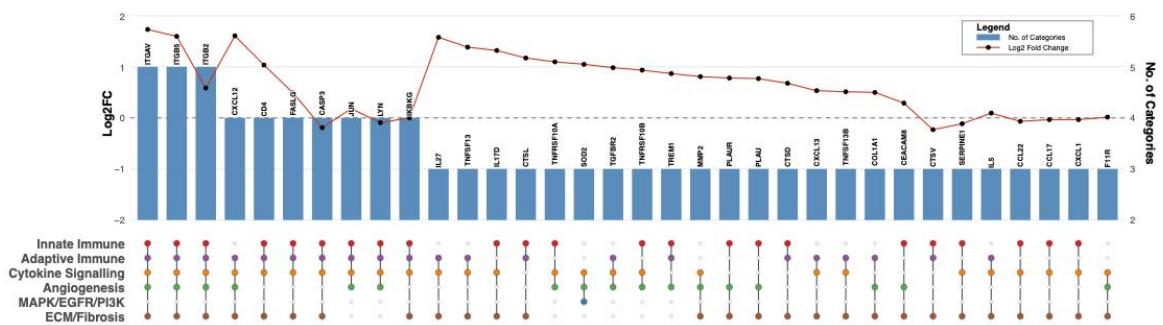

36

37 **Supplementary Figure 4:** (A) Chord diagram of biomarkers contributing to pathways in three or  
 38 more biological categories relating to steatotic fibrosis with Log2 FC plotted on concentric bar plot.  
 39 (B) UpSet plot showing number of different categories each biomarker contributes to with Log2 FC

40

41

A

Pathway Crosstalk – Burnt-out (Pooled, N=886)

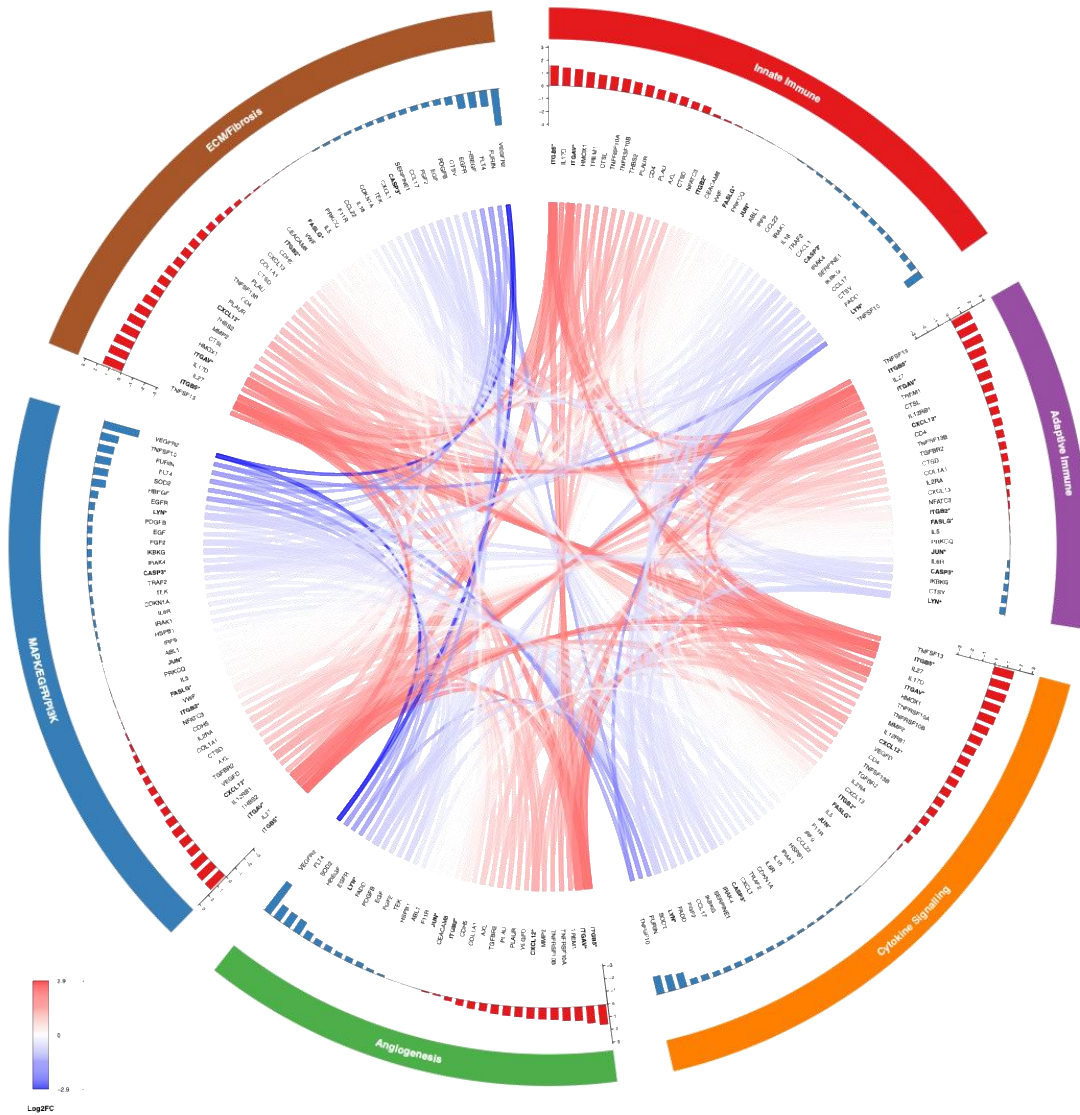

B

Hub Protein Category Membership with Log2FC – Burnt-out (Pooled, N=886)

Bars: category count | Line: Log2FC | Dashed: Log2FC = 0 (Cat. 4) | Sorted by |Log2FC| within category

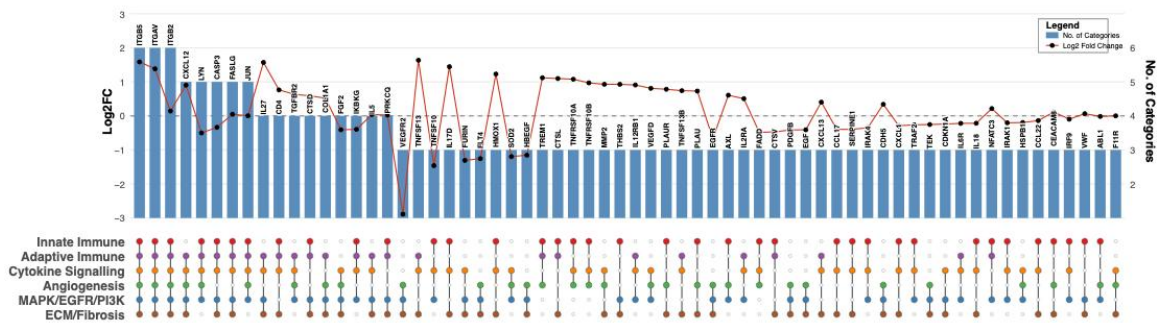

42

43 **Supplementary Figure 5:** (A) Chord diagram of biomarkers contributing to pathways in three or  
 44 more biological categories relating to burnt-out fibrosis with Log2 FC plotted on concentric bar plot.  
 45 (B) UpSet plot showing number of different categories each biomarker contributes to with Log2 FC

46

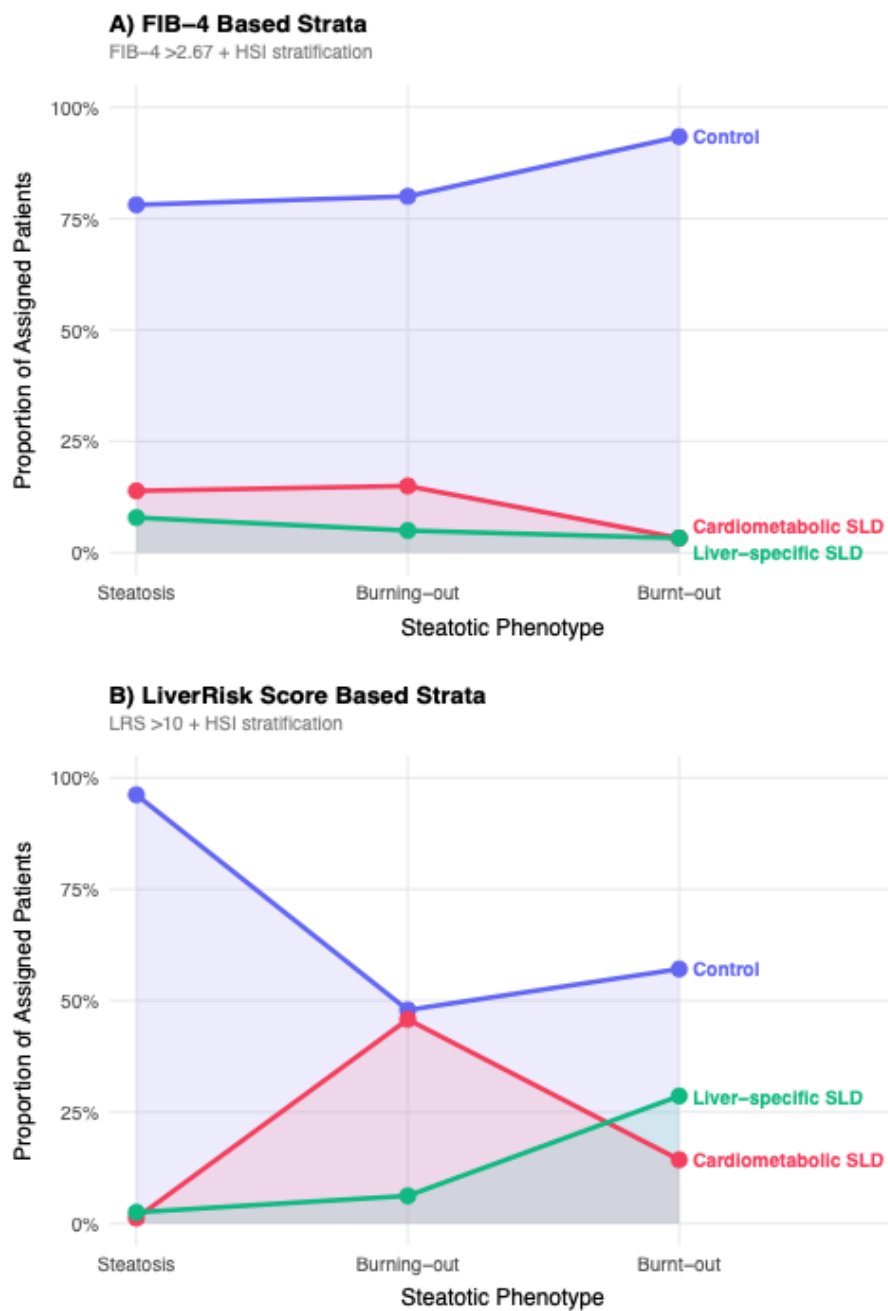

48  
 49 **Supplementary Figure 6.** Proportion of patients who were assigned to each SLD cluster  
 50 according to online calculator by Raverdy *et al* for each stage of burnt-out progression. (A)  
 51 Liver fibrosis assessed by FIB-4 (B) Liver fibrosis assessed by LRS

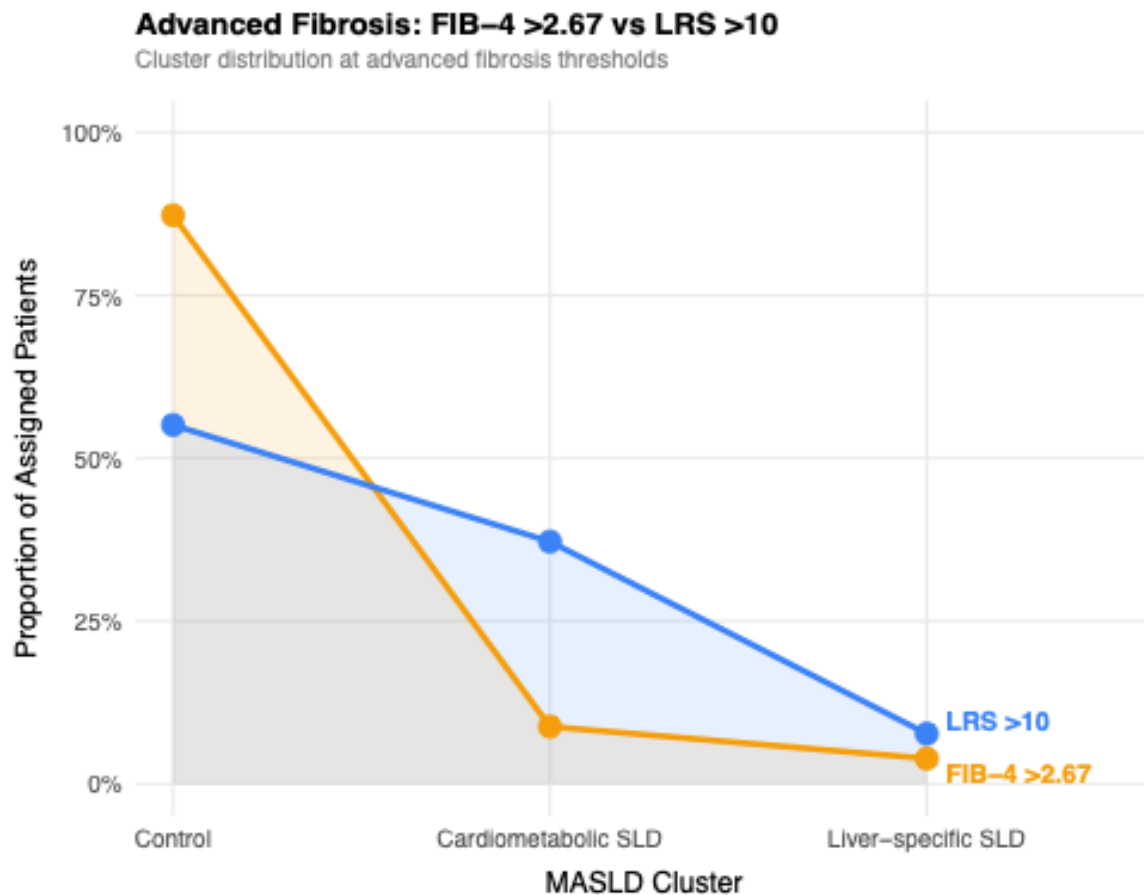

52  
 53 **Supplementary Figure 7.** Proportion of patients with liver fibrosis assessed by FIB-4 and  
 54 LRS who were assigned to each SLD cluster according to online calculator by Raverdy *et al*  
 55

56  
 57 The vast majority of patients with liver fibrosis assessed by FIB-4 were assigned to the  
 58 “control” cluster. While 55.1% of patients with LRS > 10 were also assigned to the “control”  
 59 cluster, liver fibrosis assessed by LRS identified a higher proportion of patients with a  
 60 “cardiometabolic SLD” profile. The proportion of patients with liver-specific SLD was low  
 61 across all groups, except in patients with burnt-out fibrosis assessed by LRS (28.6%).  
 62

63 **Supplementary Table 8: Pathways associated with liver fibrosis (FIB-4)**

|                    |                                                                                                                             |              |    |      |         |      |         |
|--------------------|-----------------------------------------------------------------------------------------------------------------------------|--------------|----|------|---------|------|---------|
| REAC:R-HSA-3781865 | Diseases of glycosylation                                                                                                   | Reactome     | 12 | 2.45 | 4.0e-15 | 3.14 | 5.1e-27 |
| REAC:R-HSA-5668914 | Diseases of metabolism                                                                                                      | Reactome     | 15 | 2.36 | 2.3e-14 | 3.11 | 7.1e-27 |
| WP:WP322           | Osteoblast signaling                                                                                                        | WikiPathways | 6  | 0.46 | 2.5e-13 | 2.20 | 2.2e-18 |
| REAC:R-HSA-3906995 | Diseases associated with O-glycosylation of proteins                                                                        | Reactome     | 8  | 2.16 | 6.1e-13 | 2.51 | 3.8e-22 |
| WP:WP2877          | Vitamin D receptor pathway                                                                                                  | WikiPathways | 13 | 0.48 | 6.1e-13 | 2.43 | 1.9e-21 |
| KEGG:04148         | Efferocytosis                                                                                                               | KEGG         | 10 | 0.48 | 2.3e-12 | 2.50 | 5.0e-21 |
| WP:WP5373          | Osteoarthritic chondrocyte hypertrophy                                                                                      | WikiPathways | 5  | 0.52 | 2.0e-11 | 2.00 | 2.6e-16 |
| REAC:R-HSA-2980736 | Peptide hormone metabolism                                                                                                  | Reactome     | 7  | 0.51 | 4.4e-11 | 2.45 | 2.2e-21 |
| WP:WP4331          | Neovascularization processes                                                                                                | WikiPathways | 8  | 0.52 | 7.4e-11 | 1.63 | 1.2e-08 |
| REAC:R-HSA-9694614 | Attachment and Entry                                                                                                        | Reactome     | 6  | 1.96 | 7.7e-11 | 2.41 | 1.4e-20 |
| REAC:R-HSA-9772572 | Early SARS-CoV-2 Infection Events                                                                                           | Reactome     | 6  | 1.96 | 7.7e-11 | 2.41 | 1.4e-20 |
| REAC:R-HSA-381426  | Regulation of Insulin-like Growth Factor (IGF) transport and uptake by Insulin-like Growth Factor Binding Proteins (IGFBPs) | Reactome     | 13 | 0.53 | 9.9e-11 | 2.60 | 7.3e-23 |
| KEGG:04145         | Phagosome                                                                                                                   | KEGG         | 10 | 1.95 | 1.3e-10 | 2.50 | 2.2e-21 |
| REAC:R-HSA-9615017 | FOXO-mediated transcription of oxidative stress, metabolic and neuronal genes                                               | Reactome     | 5  | 0.53 | 2.2e-10 | 2.02 | 2.3e-16 |
| REAC:R-HSA-8957275 | Post-translational protein phosphorylation                                                                                  | Reactome     | 9  | 0.55 | 7.0e-10 | 2.33 | 4.5e-20 |

## Supplementary

|                    |                                                   |              |    |      |         |      |         |
|--------------------|---------------------------------------------------|--------------|----|------|---------|------|---------|
| REAC:R-HSA-1474228 | Degradation of the extracellular matrix           | Reactome     | 14 | 0.54 | 8.3e-10 | 2.62 | 1.9e-22 |
| REAC:R-HSA-2022377 | Metabolism of Angiotensinogen to Angiotensins     | Reactome     | 5  | 1.83 | 8.3e-10 | 0.47 | 9.5e-18 |
| REAC:R-HSA-5083635 | Defective B3GALTL causes PpS                      | Reactome     | 5  | 1.87 | 1.0e-09 | 2.06 | 5.5e-16 |
| REAC:R-HSA-5173214 | O-glycosylation of TSR domain-containing proteins | Reactome     | 5  | 1.87 | 1.0e-09 | 2.06 | 5.5e-16 |
| WP:WP1539          | Angiogenesis                                      | WikiPathways | 6  | 0.55 | 1.2e-09 | 1.50 | 8.9e-07 |
| KEGG:04672         | Intestinal immune network for IgA production      | KEGG         | 8  | 1.82 | 1.4e-09 | 2.45 | 3.0e-21 |
| WP:WP3931          | Embryonic stem cell pluripotency pathways         | WikiPathways | 9  | 0.56 | 3.8e-09 | 0.64 | 1.3e-07 |
| KEGG:04380         | Osteoclast differentiation                        | KEGG         | 11 | 1.77 | 4.0e-09 | 2.08 | 5.5e-17 |
| KEGG:04512         | ECM-receptor interaction                          | KEGG         | 8  | 1.79 | 4.1e-09 | 2.07 | 3.1e-16 |
| KEGG:04658         | Th1 and Th2 cell differentiation                  | KEGG         | 10 | 0.57 | 4.6e-09 | 0.47 | 2.2e-17 |
| WP:WP5038          | Mitochondrial immune response to SARS CoV 2       | WikiPathways | 5  | 1.77 | 5.1e-09 | 0.45 | 1.1e-18 |
| KEGG:04659         | Th17 cell differentiation                         | KEGG         | 10 | 0.58 | 7.9e-09 | 2.00 | 5.8e-16 |
| WP:WP5236          | Markers of kidney cell lineage                    | WikiPathways | 7  | 1.75 | 9.0e-09 | 0.32 | 1.8e-26 |
| REAC:R-HSA-3000178 | ECM proteoglycans                                 | Reactome     | 7  | 1.76 | 1.1e-08 | 0.46 | 2.3e-17 |
| WP:WP5473          | Cytokine cytokine receptor interaction            | WikiPathways | 43 | 0.58 | 1.1e-08 | 0.46 | 2.3e-18 |
| REAC:R-HSA-5669034 | TNFs bind their physiological receptors           | Reactome     | 11 | 0.58 | 1.1e-08 | 0.46 | 5.7e-18 |
| WP:WP129           | Matrix metalloproteinases                         | WikiPathways | 5  | 0.57 | 1.4e-08 | 2.01 | 3.9e-15 |
| REAC:R-HSA-1442490 | Collagen degradation                              | Reactome     | 8  | 0.57 | 1.6e-08 | 2.52 | 7.6e-21 |
| REAC:R-HSA-5668541 | TNFR2 non-canonical NF-kB pathway                 | Reactome     | 15 | 1.70 | 2.2e-08 | 2.10 | 1.7e-17 |
| KEGG:04060         | Cytokine-cytokine receptor interaction            | KEGG         | 50 | 0.59 | 3.0e-08 | 0.46 | 2.5e-18 |

## Supplementary

|                    |                                                                          |              |    |      |         |      |         |
|--------------------|--------------------------------------------------------------------------|--------------|----|------|---------|------|---------|
| WP:WP4217          | Ebola virus infection in host                                            | WikiPathways | 11 | 0.59 | 3.1e-08 | 2.14 | 6.3e-18 |
| WP:WP5218          | Extrafollicular and follicular B cell activation by SARS CoV 2           | WikiPathways | 8  | 0.59 | 4.7e-08 | 0.42 | 5.9e-20 |
| KEGG:05205         | Proteoglycans in cancer                                                  | KEGG         | 20 | 1.67 | 1.2e-07 | 0.44 | 4.3e-19 |
| REAC:R-HSA-5673001 | RAF/MAP kinase cascade                                                   | Reactome     | 15 | 0.60 | 1.2e-07 | 1.38 | 8.9e-05 |
| WP:WP2848          | Pluripotent stem cell differentiation pathway                            | WikiPathways | 7  | 0.60 | 1.3e-07 | 1.38 | 7.7e-05 |
| REAC:R-HSA-5684996 | MAPK1/MAPK3 signaling                                                    | Reactome     | 16 | 0.60 | 1.7e-07 | 1.37 | 1.1e-04 |
| WP:WP5130          | Th17 cell differentiation pathway                                        | WikiPathways | 6  | 0.61 | 1.8e-07 | 1.93 | 1.1e-14 |
| WP:WP5283          | Chronic hyperglycemia impairment of neuron function                      | WikiPathways | 6  | 0.61 | 1.9e-07 | 2.36 | 9.8e-20 |
| REAC:R-HSA-2173782 | Binding and Uptake of Ligands by Scavenger Receptors                     | Reactome     | 7  | 1.64 | 2.2e-07 | 1.83 | 1.5e-12 |
| REAC:R-HSA-198933  | Immunoregulatory interactions between a Lymphoid and a non-Lymphoid cell | Reactome     | 15 | 0.62 | 2.6e-07 | 0.53 | 2.7e-14 |
| WP:WP5390          | Pancreatic cancer subtypes                                               | WikiPathways | 5  | 0.62 | 2.6e-07 | 1.70 | 4.4e-11 |
| REAC:R-HSA-2219530 | Constitutive Signaling by Aberrant PI3K in Cancer                        | Reactome     | 9  | 0.61 | 2.7e-07 | 1.39 | 7.6e-05 |
| KEGG:01522         | Endocrine resistance                                                     | KEGG         | 9  | 1.62 | 4.0e-07 | 0.44 | 2.1e-18 |
| REAC:R-HSA-5683057 | MAPK family signaling cascades                                           | Reactome     | 18 | 0.62 | 4.0e-07 | 1.30 | 8.8e-04 |
| REAC:R-HSA-182971  | EGFR downregulation                                                      | Reactome     | 5  | 0.61 | 4.7e-07 | 1.40 | 5.6e-05 |
| REAC:R-HSA-177929  | Signaling by EGFR                                                        | Reactome     | 5  | 0.61 | 4.7e-07 | 1.40 | 5.6e-05 |
| WP:WP5095          | Overview of proinflammatory and profibrotic mediators                    | WikiPathways | 19 | 0.62 | 5.1e-07 | 2.07 | 2.4e-16 |
| KEGG:05219         | Bladder cancer                                                           | KEGG         | 6  | 0.61 | 5.4e-07 | 1.43 | 2.2e-05 |
| WP:WP2828          | Bladder cancer                                                           | WikiPathways | 6  | 0.61 | 5.4e-07 | 1.43 | 2.2e-05 |

## Supplementary

|                    |                                                                                |              |    |      |         |      |         |
|--------------------|--------------------------------------------------------------------------------|--------------|----|------|---------|------|---------|
| KEGG:04514         | Cell adhesion molecules                                                        | KEGG         | 11 | 0.62 | 5.7e-07 | 0.50 | 2.7e-15 |
| KEGG:05214         | Glioma                                                                         | KEGG         | 7  | 0.63 | 6.4e-07 | 1.30 | 9.9e-04 |
| REAC:R-HSA-2219528 | PI3K/AKT Signaling in Cancer                                                   | Reactome     | 10 | 0.62 | 8.9e-07 | 1.34 | 3.6e-04 |
| KEGG:05120         | Epithelial cell signaling in Helicobacter pylori infection                     | KEGG         | 8  | 0.63 | 1.2e-06 | 1.24 | 7.1e-03 |
| REAC:R-HSA-9820960 | Respiratory syncytial virus (RSV) attachment and entry                         | Reactome     | 5  | 0.63 | 1.2e-06 | 2.17 | 5.7e-18 |
| KEGG:05218         | Melanoma                                                                       | KEGG         | 9  | 0.63 | 1.3e-06 | 1.36 | 1.8e-04 |
| REAC:R-HSA-9006931 | Signaling by Nuclear Receptors                                                 | Reactome     | 14 | 0.64 | 1.4e-06 | 1.92 | 1.3e-14 |
| REAC:R-HSA-1592389 | Activation of Matrix Metalloproteinases                                        | Reactome     | 6  | 0.63 | 1.6e-06 | 1.97 | 6.0e-15 |
| REAC:R-HSA-216083  | Integrin cell surface interactions                                             | Reactome     | 9  | 0.64 | 1.6e-06 | 0.51 | 1.1e-14 |
| KEGG:05223         | Non-small cell lung cancer                                                     | KEGG         | 7  | 0.64 | 1.8e-06 | 1.45 | 5.2e-06 |
| REAC:R-HSA-1280218 | Adaptive Immune System                                                         | Reactome     | 35 | 0.64 | 1.8e-06 | 0.51 | 2.6e-15 |
| WP:WP382           | MAPK signaling                                                                 | WikiPathways | 17 | 0.64 | 1.9e-06 | 1.37 | 9.4e-05 |
| REAC:R-HSA-8939211 | ESR-mediated signaling                                                         | Reactome     | 13 | 0.64 | 2.0e-06 | 1.87 | 1.0e-13 |
| WP:WP4255          | Non small cell lung cancer                                                     | WikiPathways | 7  | 0.64 | 2.0e-06 | 1.47 | 3.6e-06 |
| REAC:R-HSA-6811558 | PI5P, PP2A and IER3 Regulate PI3K/AKT Signaling                                | Reactome     | 12 | 0.64 | 2.3e-06 | 1.27 | 2.9e-03 |
| REAC:R-HSA-199418  | Negative regulation of the PI3K/AKT network                                    | Reactome     | 12 | 0.64 | 2.3e-06 | 1.27 | 2.9e-03 |
| WP:WP3624          | Lung fibrosis                                                                  | WikiPathways | 10 | 0.64 | 2.4e-06 | 1.39 | 5.8e-05 |
| REAC:R-HSA-5676594 | TNF receptor superfamily (TNFSF) members mediating non-canonical NF-kB pathway | Reactome     | 5  | 0.65 | 2.6e-06 | 1.88 | 4.3e-14 |
| REAC:R-HSA-202733  | Cell surface interactions at the vascular wall                                 | Reactome     | 21 | 1.54 | 3.2e-06 | 0.49 | 2.9e-16 |

## Supplementary

|                    |                                                               |              |    |      |         |      |         |
|--------------------|---------------------------------------------------------------|--------------|----|------|---------|------|---------|
| REAC:R-HSA-1257604 | PIP3 activates AKT signaling                                  | Reactome     | 14 | 0.65 | 6.7e-06 | 1.25 | 5.4e-03 |
| KEGG:04015         | Rap1 signaling pathway                                        | KEGG         | 15 | 0.66 | 6.7e-06 | 1.37 | 9.7e-05 |
| KEGG:04650         | Natural killer cell mediated cytotoxicity                     | KEGG         | 11 | 0.66 | 6.9e-06 | 0.53 | 7.4e-14 |
| KEGG:05210         | Colorectal cancer                                             | KEGG         | 7  | 0.66 | 7.8e-06 | 1.18 | 3.5e-02 |
| REAC:R-HSA-6798695 | Neutrophil degranulation                                      | Reactome     | 27 | 1.51 | 8.3e-06 | 0.57 | 9.0e-12 |
| KEGG:04630         | JAK-STAT signaling pathway                                    | KEGG         | 15 | 0.66 | 9.1e-06 | 1.22 | 1.2e-02 |
| KEGG:04933         | AGE-RAGE signaling pathway in diabetic complications          | KEGG         | 9  | 0.67 | 1.4e-05 | 2.34 | 9.8e-20 |
| KEGG:05167         | Kaposi sarcoma-associated herpesvirus infection               | KEGG         | 14 | 0.68 | 3.2e-05 | 1.24 | 7.1e-03 |
| KEGG:05323         | Rheumatoid arthritis                                          | KEGG         | 12 | 1.46 | 3.9e-05 | 0.46 | 3.3e-18 |
| WP:WP5144          | NRP1 triggered signaling in pancreatic cancer                 | WikiPathways | 8  | 0.69 | 5.9e-05 | 1.59 | 2.5e-08 |
| KEGG:04061         | Viral protein interaction with cytokine and cytokine receptor | KEGG         | 19 | 0.69 | 6.4e-05 | 0.58 | 3.1e-11 |
| WP:WP2572          | Primary focal segmental glomerulosclerosis FSGS               | WikiPathways | 7  | 1.44 | 7.3e-05 | 0.53 | 1.4e-14 |
| KEGG:04014         | Ras signaling pathway                                         | KEGG         | 19 | 0.71 | 1.4e-04 | 1.17 | 4.0e-02 |
| KEGG:04010         | MAPK signaling pathway                                        | KEGG         | 29 | 0.71 | 2.1e-04 | 1.19 | 2.5e-02 |
| KEGG:01521         | EGFR tyrosine kinase inhibitor resistance                     | KEGG         | 11 | 0.72 | 2.1e-04 | 1.31 | 8.9e-04 |
| KEGG:05418         | Fluid shear stress and atherosclerosis                        | KEGG         | 14 | 1.40 | 2.1e-04 | 0.56 | 8.1e-12 |
| WP:WP4806          | EGFR tyrosine kinase inhibitor resistance                     | WikiPathways | 11 | 0.72 | 2.1e-04 | 1.31 | 8.9e-04 |
| KEGG:05160         | Hepatitis C                                                   | KEGG         | 12 | 0.71 | 2.5e-04 | 1.19 | 3.0e-02 |
| WP:WP474           | Endochondral ossification                                     | WikiPathways | 7  | 0.72 | 3.4e-04 | 1.93 | 4.0e-15 |
| WP:WP4808          | Endochondral ossification with skeletal dysplasias            | WikiPathways | 7  | 0.72 | 3.4e-04 | 1.93 | 4.0e-15 |
| KEGG:01524         | Platinum drug resistance                                      | KEGG         | 6  | 0.72 | 3.6e-04 | 1.22 | 1.4e-02 |
| KEGG:04610         | Complement and coagulation cascades                           | KEGG         | 8  | 0.72 | 4.7e-04 | 1.75 | 2.3e-11 |

## Supplementary

|                    |                                                                |              |     |      |         |      |         |
|--------------------|----------------------------------------------------------------|--------------|-----|------|---------|------|---------|
| REAC:R-HSA-168256  | Immune System                                                  | Reactome     | 119 | 0.73 | 4.8e-04 | 0.56 | 8.0e-13 |
| WP:WP2328          | Allograft rejection                                            | WikiPathways | 8   | 0.74 | 5.8e-04 | 1.69 | 7.5e-11 |
| KEGG:04020         | Calcium signaling pathway                                      | KEGG         | 15  | 0.74 | 6.1e-04 | 1.18 | 3.5e-02 |
| KEGG:04662         | B cell receptor signaling pathway                              | KEGG         | 8   | 1.36 | 7.1e-04 | 0.79 | 2.6e-03 |
| KEGG:04068         | FoxO signaling pathway                                         | KEGG         | 9   | 0.74 | 8.5e-04 | 1.24 | 6.2e-03 |
| WP:WP2586          | Aryl hydrocarbon receptor pathway                              | WikiPathways | 6   | 1.34 | 1.2e-03 | 0.67 | 3.7e-07 |
| WP:WP558           | Complement and coagulation cascades                            | WikiPathways | 7   | 0.75 | 1.4e-03 | 1.70 | 7.3e-11 |
| WP:WP3896          | Dengue 2 interactions with complement and coagulation cascades | WikiPathways | 7   | 0.75 | 1.4e-03 | 1.70 | 7.3e-11 |
| WP:WP2817          | Mammary gland development pregnancy and lactation stage 3 of 4 | WikiPathways | 6   | 1.31 | 3.0e-03 | 1.87 | 1.9e-12 |
| WP:WP4541          | Hippo Merlin signaling dysregulation                           | WikiPathways | 11  | 0.77 | 3.3e-03 | 0.61 | 2.6e-09 |
| REAC:R-HSA-6785807 | Interleukin-4 and Interleukin-13 signaling                     | Reactome     | 13  | 0.79 | 7.4e-03 | 0.57 | 6.6e-12 |
| WP:WP5285          | Immune infiltration in pancreatic cancer                       | WikiPathways | 8   | 1.27 | 8.0e-03 | 0.60 | 4.9e-10 |
| REAC:R-HSA-168249  | Innate Immune System                                           | Reactome     | 55  | 1.26 | 8.2e-03 | 0.60 | 2.1e-10 |
| WP:WP3680          | Physico chemical features and toxicity associated pathways     | WikiPathways | 6   | 0.79 | 1.0e-02 | 0.60 | 3.9e-09 |
| REAC:R-HSA-170834  | Signaling by TGF-beta Receptor Complex                         | Reactome     | 7   | 1.25 | 1.3e-02 | 0.59 | 1.5e-10 |
| WP:WP615           | Senescence and autophagy in cancer                             | WikiPathways | 11  | 1.24 | 1.5e-02 | 0.65 | 8.6e-08 |
| REAC:R-HSA-9009391 | Extra-nuclear estrogen signaling                               | Reactome     | 9   | 0.81 | 1.8e-02 | 1.36 | 7.7e-05 |
| REAC:R-HSA-194138  | Signaling by VEGF                                              | Reactome     | 8   | 0.82 | 3.0e-02 | 1.75 | 4.0e-11 |
| KEGG:05224         | Breast cancer                                                  | KEGG         | 12  | 0.83 | 3.1e-02 | 0.68 | 8.7e-07 |

## Supplementary

|            |                                                        |              |    |      |         |      |         |
|------------|--------------------------------------------------------|--------------|----|------|---------|------|---------|
| KEGG:04210 | Apoptosis                                              | KEGG         | 16 | 1.20 | 4.1e-02 | 0.72 | 1.1e-05 |
| WP:WP3888  | VEGFA VEGFR2 signaling                                 | WikiPathways | 23 | 0.84 | 4.5e-02 | 1.68 | 9.2e-11 |
| WP:WP5078  | T cell modulation and desmoplasia in pancreatic cancer | WikiPathways | 14 | 0.84 | 4.7e-02 | 1.71 | 7.5e-11 |

65 **Supplementary Table 9: Log-fold change of all proteins, liver fibrosis assessed by FIB-4**

| UniProt_ID    | Gene_Symbol | Gene_Name                                                 | Log2FC_Index<br>(95% CI) | P_Index | Log2FC_Validation<br>(95% CI) | P_Validation |
|---------------|-------------|-----------------------------------------------------------|--------------------------|---------|-------------------------------|--------------|
| <b>Q9BUD6</b> | SPON2       | spondin 2                                                 | 2.37 (1.54, 3.21)        | <0.001  | 3.53 (2.65, 4.42)             | <0.001       |
| <b>P51888</b> | PRELP       | proline and arginine rich end leucine rich repeat protein | 2.15 (1.61, 2.68)        | <0.001  | 3.59 (2.95, 4.24)             | <0.001       |
| <b>P07585</b> | DCN         | decorin                                                   | 2.11 (1.63, 2.59)        | <0.001  | 3.24 (2.70, 3.79)             | <0.001       |
| <b>P35968</b> | KDR         | kinase insert domain receptor                             | -1.85 (-2.36, -1.35)     | <0.001  | -2.23 (-2.83, -1.62)          | <0.001       |
| <b>Q14956</b> | GPNMB       | glycoprotein nmb                                          | 1.82 (1.17, 2.47)        | <0.001  | 3.25 (2.52, 3.98)             | <0.001       |
| <b>P06756</b> | ITGAV       | integrin subunit alpha V                                  | 1.68 (1.15, 2.20)        | <0.001  | 2.12 (1.59, 2.64)             | <0.001       |
| <b>P09326</b> | CD48        | CD48 molecule                                             | 1.68 (1.20, 2.15)        | <0.001  | 2.22 (1.72, 2.73)             | <0.001       |
| <b>P15260</b> | IFNGR1      | interferon gamma receptor 1                               | 1.59 (1.19, 1.99)        | <0.001  | 1.93 (1.52, 2.34)             | <0.001       |
| <b>P04179</b> | SOD2        | superoxide dismutase 2                                    | -1.58 (-2.75, -0.41)     | 0.008   | 0.25 (-0.97, 1.47)            | 0.692        |
| <b>P18084</b> | ITGB5       | integrin subunit beta 5                                   | 1.57 (1.15, 1.99)        | <0.001  | 2.03 (1.57, 2.50)             | <0.001       |
| <b>P01833</b> | PIGR        | polymeric immunoglobulin receptor                         | 1.48 (0.27, 2.69)        | 0.017   | 1.33 (0.24, 2.42)             | 0.017        |
| <b>Q14242</b> | SELPLG      | selectin P ligand                                         | -1.46 (-2.03, -0.88)     | <0.001  | -0.47 (-0.99, 0.05)           | 0.075        |
| <b>Q8NEV9</b> | IL27        | interleukin 27                                            | 1.31 (0.95, 1.66)        | <0.001  | 1.48 (1.17, 1.80)             | <0.001       |

## Supplementary

|               |           |                                           |                      |        |                      |        |
|---------------|-----------|-------------------------------------------|----------------------|--------|----------------------|--------|
| <b>Q8IYS5</b> | OSCAR     | osteoclast associated Ig-like receptor    | 1.24 (0.68, 1.80)    | <0.001 | 2.58 (1.91, 3.25)    | <0.001 |
| <b>O75888</b> | TNFSF13   | TNF superfamily member 13                 | 1.23 (0.89, 1.56)    | <0.001 | 1.61 (1.25, 1.97)    | <0.001 |
| <b>P13726</b> | F3        | coagulation factor III, tissue factor     | 1.22 (0.83, 1.60)    | <0.001 | 1.77 (1.35, 2.19)    | <0.001 |
| <b>P18627</b> | LAG3      | lymphocyte activating 3                   | 1.21 (0.90, 1.52)    | <0.001 | 1.52 (1.23, 1.82)    | <0.001 |
| <b>P24394</b> | IL4R      | interleukin 4 receptor                    | 1.18 (0.88, 1.47)    | <0.001 | 1.36 (1.09, 1.64)    | <0.001 |
| <b>Q9UM47</b> | NOTCH3    | notch receptor 3                          | 1.16 (0.91, 1.42)    | <0.001 | 1.56 (1.26, 1.86)    | <0.001 |
| <b>Q9BYH1</b> | SEZ6L     | seizure related 6 homolog like            | 1.12 (0.65, 1.58)    | <0.001 | 2.05 (1.54, 2.56)    | <0.001 |
| <b>P35442</b> | THBS2     | thrombospondin 2                          | 1.10 (0.51, 1.68)    | <0.001 | 1.47 (0.88, 2.06)    | <0.001 |
| <b>Q7Z6M3</b> | MILR1     | mast cell immunoglobulin like receptor 1  | 1.10 (0.82, 1.37)    | <0.001 | 1.34 (1.07, 1.61)    | <0.001 |
| <b>P09486</b> | SPARC     | secreted protein acidic and cysteine rich | -1.08 (-1.61, -0.55) | <0.001 | -0.26 (-0.72, 0.19)  | 0.252  |
| <b>O00300</b> | TNFRSF11B | TNF receptor superfamily member 11b       | 1.06 (0.81, 1.32)    | <0.001 | 1.42 (1.11, 1.72)    | <0.001 |
| <b>P09601</b> | HMOX1     | heme oxygenase 1                          | 1.04 (0.70, 1.38)    | <0.001 | 1.35 (1.02, 1.68)    | <0.001 |
| <b>Q9BQ51</b> | PDCD1LG2  | programmed cell death 1 ligand 2          | 1.04 (0.69, 1.39)    | <0.001 | 1.73 (1.33, 2.12)    | <0.001 |
| <b>P50591</b> | TNFSF10   | TNF superfamily member 10                 | -1.03 (-1.37, -0.68) | <0.001 | -1.25 (-1.62, -0.88) | <0.001 |
| <b>Q8TAD2</b> | IL17D     | interleukin 17D                           | 1.03 (0.61, 1.44)    | <0.001 | 1.35 (0.94, 1.76)    | <0.001 |

## Supplementary

|               |          |                                                            |                      |        |                      |        |
|---------------|----------|------------------------------------------------------------|----------------------|--------|----------------------|--------|
| <b>Q14508</b> | WFDC2    | WAP four-disulfide core domain 2                           | 1.02 (0.68, 1.36)    | <0.001 | 1.26 (0.91, 1.61)    | <0.001 |
| <b>Q9HBG7</b> | LY9      | lymphocyte antigen 9                                       | 1.01 (0.65, 1.36)    | <0.001 | 1.65 (1.26, 2.03)    | <0.001 |
| <b>P07711</b> | CTSL     | cathepsin L                                                | 1.00 (0.66, 1.33)    | <0.001 | 1.24 (0.95, 1.53)    | <0.001 |
| <b>P52823</b> | STC1     | stanniocalcin 1                                            | 0.99 (0.65, 1.32)    | <0.001 | 1.28 (0.83, 1.74)    | <0.001 |
| <b>P29317</b> | EPHA2    | EPH receptor A2                                            | 0.98 (0.68, 1.29)    | <0.001 | 1.28 (0.98, 1.57)    | <0.001 |
| <b>O00182</b> | LGALS9   | galectin 9                                                 | 0.96 (0.56, 1.36)    | <0.001 | 1.24 (0.83, 1.65)    | <0.001 |
| <b>P08069</b> | IGF1R    | insulin like growth factor 1 receptor                      | 0.94 (0.59, 1.29)    | <0.001 | 1.64 (1.26, 2.02)    | <0.001 |
| <b>O00548</b> | DLL1     | delta like canonical Notch ligand 1                        | 0.94 (0.58, 1.30)    | <0.001 | 1.41 (1.02, 1.80)    | <0.001 |
| <b>Q76LX8</b> | ADAMTS13 | ADAM metalloproteinase with thrombospondin type 1 motif 13 | -0.93 (-1.55, -0.31) | 0.003  | -0.41 (-1.11, 0.29)  | 0.246  |
| <b>Q99075</b> | HBEGF    | heparin binding EGF like growth factor                     | -0.92 (-1.21, -0.64) | <0.001 | -0.59 (-0.97, -0.21) | 0.002  |
| <b>Q9HCB6</b> | SPON1    | spondin 1                                                  | 0.92 (0.65, 1.18)    | <0.001 | 1.12 (0.85, 1.40)    | <0.001 |
| <b>O43736</b> | ITM2A    | integral membrane protein 2A                               | 0.92 (0.65, 1.18)    | <0.001 | 0.63 (0.41, 0.86)    | <0.001 |
| <b>Q9BYF1</b> | ACE2     | angiotensin converting enzyme 2                            | 0.91 (0.68, 1.15)    | <0.001 | 0.76 (0.56, 0.95)    | <0.001 |
| <b>P35052</b> | GPC1     | glypican 1                                                 | 0.91 (0.57, 1.26)    | <0.001 | 1.52 (1.14, 1.90)    | <0.001 |
| <b>Q96PD2</b> | DCBLD2   | discoidin, CUB and LCCL domain containing 2                | 0.91 (0.49, 1.33)    | <0.001 | 1.00 (0.59, 1.41)    | <0.001 |

## Supplementary

|               |           |                                            |                      |        |                      |        |
|---------------|-----------|--------------------------------------------|----------------------|--------|----------------------|--------|
| <b>P21860</b> | ERBB3     | erb-b2 receptor tyrosine kinase 3          | -0.89 (-1.38, -0.41) | <0.001 | -1.10 (-1.70, -0.51) | <0.001 |
| <b>P42701</b> | IL12RB1   | interleukin 12 receptor subunit beta 1     | 0.89 (0.57, 1.21)    | <0.001 | 1.08 (0.76, 1.41)    | <0.001 |
| <b>Q9UMR7</b> | CLEC4A    | C-type lectin domain family 4 member A     | -0.87 (-1.22, -0.51) | <0.001 | 0.05 (-0.29, 0.40)   | 0.758  |
| <b>P16870</b> | CPE       | carboxypeptidase E                         | 0.86 (0.52, 1.20)    | <0.001 | 1.90 (1.48, 2.31)    | <0.001 |
| <b>P35916</b> | FLT4      | fms related receptor tyrosine kinase 4     | -0.85 (-1.35, -0.35) | <0.001 | -0.16 (-0.72, 0.40)  | 0.572  |
| <b>Q8NHJ6</b> | LILRB4    | leukocyte immunoglobulin like receptor B4  | 0.85 (0.61, 1.08)    | <0.001 | 0.75 (0.53, 0.97)    | <0.001 |
| <b>P78310</b> | CXADR     | CXADR Ig-like cell adhesion molecule       | 0.83 (0.60, 1.06)    | <0.001 | 1.01 (0.78, 1.24)    | <0.001 |
| <b>O00220</b> | TNFRSF10A | TNF receptor superfamily member 10a        | 0.82 (0.53, 1.12)    | <0.001 | 1.10 (0.81, 1.38)    | <0.001 |
| <b>Q9UBX7</b> | KLK11     | kallikrein related peptidase 11            | 0.82 (0.55, 1.09)    | <0.001 | 1.06 (0.80, 1.33)    | <0.001 |
| <b>O95388</b> | CCN4      | cellular communication network factor 4    | 0.82 (0.58, 1.05)    | <0.001 | 1.12 (0.88, 1.37)    | <0.001 |
| <b>Q9NQ30</b> | ESM1      | endothelial cell specific molecule 1       | 0.80 (0.57, 1.03)    | <0.001 | 1.31 (1.06, 1.57)    | <0.001 |
| <b>Q8N608</b> | DPP10     | dipeptidyl peptidase like 10               | 0.80 (0.56, 1.04)    | <0.001 | 1.11 (0.84, 1.37)    | <0.001 |
| <b>P06858</b> | LPL       | lipoprotein lipase                         | 0.79 (0.49, 1.10)    | <0.001 | 0.49 (0.17, 0.81)    | 0.002  |
| <b>P18564</b> | ITGB6     | integrin subunit beta 6                    | 0.79 (0.43, 1.15)    | <0.001 | 1.47 (1.11, 1.83)    | <0.001 |
| <b>P37173</b> | TGFBR2    | transforming growth factor beta receptor 2 | 0.79 (0.50, 1.07)    | <0.001 | 1.01 (0.71, 1.30)    | <0.001 |

## Supplementary

|               |           |                                                  |                      |        |                      |        |
|---------------|-----------|--------------------------------------------------|----------------------|--------|----------------------|--------|
| <b>O14763</b> | TNFRSF10B | TNF receptor superfamily member 10b              | 0.78 (0.54, 1.02)    | <0.001 | 0.93 (0.70, 1.15)    | <0.001 |
| <b>O95998</b> | IL18BP    | interleukin 18 binding protein                   | 0.77 (0.55, 1.00)    | <0.001 | 1.03 (0.77, 1.29)    | <0.001 |
| <b>P54760</b> | EPHB4     | EPH receptor B4                                  | 0.76 (0.49, 1.03)    | <0.001 | 1.05 (0.74, 1.36)    | <0.001 |
| <b>P10747</b> | CD28      | CD28 molecule                                    | 0.75 (0.44, 1.07)    | <0.001 | 1.16 (0.83, 1.49)    | <0.001 |
| <b>Q86VB7</b> | CD163     | CD163 molecule                                   | 0.74 (0.53, 0.96)    | <0.001 | 0.87 (0.63, 1.12)    | <0.001 |
| <b>Q9BWW1</b> | BOC       | BOC cell adhesion associated, oncogene regulated | 0.73 (0.34, 1.12)    | <0.001 | 1.80 (1.36, 2.24)    | <0.001 |
| <b>Q16790</b> | CA9       | carbonic anhydrase 9                             | 0.73 (0.53, 0.92)    | <0.001 | 0.91 (0.71, 1.12)    | <0.001 |
| <b>P14778</b> | IL1R1     | interleukin 1 receptor type 1                    | 0.73 (0.49, 0.97)    | <0.001 | 1.02 (0.71, 1.32)    | <0.001 |
| <b>P30530</b> | AXL       | AXL receptor tyrosine kinase                     | 0.73 (0.49, 0.96)    | <0.001 | 0.96 (0.68, 1.25)    | <0.001 |
| <b>P07949</b> | RET       | ret proto-oncogene                               | -0.72 (-0.97, -0.47) | <0.001 | -0.74 (-0.98, -0.49) | <0.001 |
| <b>Q99988</b> | GDF15     | growth differentiation factor 15                 | 0.71 (0.54, 0.88)    | <0.001 | 0.85 (0.67, 1.03)    | <0.001 |
| <b>P18065</b> | IGFBP2    | insulin like growth factor binding protein 2     | 0.71 (0.52, 0.89)    | <0.001 | 0.71 (0.52, 0.90)    | <0.001 |
| <b>O00592</b> | PODXL     | podocalyxin like                                 | 0.70 (0.12, 1.28)    | 0.019  | 1.16 (0.48, 1.83)    | <0.001 |
| <b>Q12866</b> | MERTK     | MER proto-oncogene, tyrosine kinase              | 0.70 (0.41, 0.98)    | <0.001 | 1.29 (0.96, 1.62)    | <0.001 |
| <b>Q16270</b> | IGFBP7    | insulin like growth factor binding protein 7     | 0.69 (0.50, 0.89)    | <0.001 | 1.12 (0.89, 1.35)    | <0.001 |

## Supplementary

|               |          |                                                        |                      |        |                      |        |
|---------------|----------|--------------------------------------------------------|----------------------|--------|----------------------|--------|
| <b>Q6EIG7</b> | CLEC6A   | C-type lectin domain containing 6A                     | 0.68 (0.41, 0.96)    | <0.001 | 0.81 (0.56, 1.07)    | <0.001 |
| <b>Q99727</b> | TIMP4    | TIMP metalloproteinase inhibitor 4                     | 0.68 (0.47, 0.89)    | <0.001 | 0.60 (0.36, 0.83)    | <0.001 |
| <b>Q9NP99</b> | TREM1    | triggering receptor expressed on myeloid cells 1       | 0.68 (0.41, 0.95)    | <0.001 | 0.93 (0.67, 1.19)    | <0.001 |
| <b>P98160</b> | HSPG2    | heparan sulfate proteoglycan 2                         | 0.68 (0.46, 0.90)    | <0.001 | 1.00 (0.73, 1.28)    | <0.001 |
| <b>P01135</b> | TGFA     | transforming growth factor alpha                       | 0.67 (0.39, 0.95)    | <0.001 | 1.11 (0.79, 1.43)    | <0.001 |
| <b>Q03405</b> | PLAUR    | plasminogen activator, urokinase receptor              | 0.66 (0.45, 0.88)    | <0.001 | 0.82 (0.58, 1.06)    | <0.001 |
| <b>O95407</b> | TNFRSF6B | TNF receptor superfamily member 6b                     | 0.66 (0.47, 0.85)    | <0.001 | 0.76 (0.58, 0.94)    | <0.001 |
| <b>P78324</b> | SIRPA    | signal regulatory protein alpha                        | 0.66 (0.42, 0.89)    | <0.001 | 0.62 (0.39, 0.86)    | <0.001 |
| <b>O60449</b> | LY75     | lymphocyte antigen 75                                  | 0.65 (0.33, 0.98)    | <0.001 | 1.33 (0.96, 1.71)    | <0.001 |
| <b>P26842</b> | CD27     | CD27 molecule                                          | 0.65 (0.37, 0.93)    | <0.001 | 0.92 (0.64, 1.21)    | <0.001 |
| <b>P10451</b> | SPP1     | secreted phosphoprotein 1                              | 0.65 (0.47, 0.83)    | <0.001 | 0.79 (0.58, 0.99)    | <0.001 |
| <b>Q9Y3P8</b> | SIT1     | signaling threshold regulating transmembrane adaptor 1 | -0.65 (-0.94, -0.36) | <0.001 | -0.52 (-0.79, -0.26) | <0.001 |
| <b>P08253</b> | MMP2     | matrix metalloproteinase 2                             | 0.65 (0.44, 0.86)    | <0.001 | 1.02 (0.77, 1.28)    | <0.001 |
| <b>Q13740</b> | ALCAM    | activated leukocyte cell adhesion molecule             | 0.65 (0.38, 0.91)    | <0.001 | 1.12 (0.78, 1.45)    | <0.001 |
| <b>P15514</b> | AREG     | amphiregulin                                           | 0.65 (0.40, 0.89)    | <0.001 | 0.84 (0.63, 1.06)    | <0.001 |

## Supplementary

|               |          |                                                |                      |        |                      |        |
|---------------|----------|------------------------------------------------|----------------------|--------|----------------------|--------|
| <b>P01730</b> | CD4      | CD4 molecule                                   | 0.64 (0.32, 0.97)    | <0.001 | 1.48 (1.08, 1.88)    | <0.001 |
| <b>Q15303</b> | ERBB4    | erb-b2 receptor tyrosine kinase 4              | 0.64 (0.23, 1.05)    | 0.002  | 1.52 (1.04, 1.99)    | <0.001 |
| <b>P36941</b> | LTBR     | lymphotoxin beta receptor                      | 0.64 (0.42, 0.86)    | <0.001 | 0.88 (0.63, 1.13)    | <0.001 |
| <b>Q6UXB4</b> | CLEC4G   | C-type lectin domain family 4 member G         | -0.64 (-0.98, -0.30) | <0.001 | -0.27 (-0.61, 0.07)  | 0.123  |
| <b>P20333</b> | TNFRSF1B | TNF receptor superfamily member 1B             | 0.63 (0.44, 0.81)    | <0.001 | 0.86 (0.65, 1.07)    | <0.001 |
| <b>P00749</b> | PLAU     | plasminogen activator, urokinase               | 0.61 (0.37, 0.85)    | <0.001 | 1.08 (0.76, 1.39)    | <0.001 |
| <b>P09958</b> | FURIN    | furin, paired basic amino acid cleaving enzyme | -0.61 (-0.93, -0.30) | <0.001 | -0.69 (-1.04, -0.35) | <0.001 |
| <b>Q13219</b> | PAPPA    | pappalysin 1                                   | 0.61 (0.39, 0.83)    | <0.001 | 1.01 (0.78, 1.23)    | <0.001 |
| <b>P78410</b> | BTN3A2   | butyrophilin subfamily 3 member A2             | 0.60 (0.33, 0.88)    | <0.001 | 0.76 (0.49, 1.03)    | <0.001 |
| <b>Q07065</b> | CKAP4    | cytoskeleton associated protein 4              | 0.60 (0.36, 0.83)    | <0.001 | 0.96 (0.72, 1.20)    | <0.001 |
| <b>P49763</b> | PGF      | placental growth factor                        | 0.59 (0.33, 0.86)    | <0.001 | 1.24 (0.94, 1.54)    | <0.001 |
| <b>O00622</b> | CCN1     | cellular communication network factor 1        | 0.59 (0.35, 0.84)    | <0.001 | 1.27 (0.99, 1.55)    | <0.001 |
| <b>P40225</b> | THPO     | thrombopoietin                                 | -0.59 (-0.92, -0.26) | <0.001 | -0.12 (-0.46, 0.22)  | 0.493  |
| <b>P47992</b> | XCL1     | X-C motif chemokine ligand 1                   | 0.59 (0.35, 0.83)    | <0.001 | 0.83 (0.59, 1.06)    | <0.001 |
| <b>Q01638</b> | IL1RL1   | interleukin 1 receptor like 1                  | 0.59 (0.44, 0.74)    | <0.001 | 0.77 (0.60, 0.94)    | <0.001 |

## Supplementary

|               |         |                                                 |                      |        |                     |        |
|---------------|---------|-------------------------------------------------|----------------------|--------|---------------------|--------|
| <b>P07339</b> | CTSD    | cathepsin D                                     | 0.59 (0.37, 0.81)    | <0.001 | 0.88 (0.62, 1.13)   | <0.001 |
| <b>O60911</b> | CTSV    | cathepsin V                                     | -0.59 (-0.88, -0.29) | <0.001 | -0.17 (-0.42, 0.08) | 0.193  |
| <b>Q6BAA4</b> | FCRLB   | Fc receptor like B                              | 0.58 (0.38, 0.78)    | <0.001 | 0.56 (0.37, 0.75)   | <0.001 |
| <b>Q96P31</b> | FCRL3   | Fc receptor like 3                              | 0.58 (0.21, 0.95)    | 0.002  | 0.89 (0.55, 1.22)   | <0.001 |
| <b>P48061</b> | CXCL12  | C-X-C motif chemokine ligand 12                 | 0.58 (-0.07, 1.23)   | 0.08   | 1.81 (1.11, 2.52)   | <0.001 |
| <b>Q9UHC6</b> | CNTNAP2 | contactin associated protein 2                  | 0.56 (0.26, 0.86)    | <0.001 | 0.96 (0.66, 1.27)   | <0.001 |
| <b>O76036</b> | NCR1    | natural cytotoxicity triggering receptor 1      | 0.56 (0.33, 0.79)    | <0.001 | 0.59 (0.35, 0.83)   | <0.001 |
| <b>P19883</b> | FST     | follistatin                                     | 0.56 (0.31, 0.81)    | <0.001 | 1.41 (1.11, 1.71)   | <0.001 |
| <b>P48740</b> | MASP1   | MBL associated serine protease 1                | 0.56 (0.14, 0.98)    | 0.01   | 1.44 (0.98, 1.91)   | <0.001 |
| <b>Q9UBR2</b> | CTSZ    | cathepsin Z                                     | 0.56 (0.32, 0.80)    | <0.001 | 0.72 (0.43, 1.00)   | <0.001 |
| <b>P58499</b> | FAM3B   | FAM3 metabolism regulating signaling molecule B | 0.55 (0.28, 0.82)    | <0.001 | 0.71 (0.41, 1.01)   | <0.001 |
| <b>Q14435</b> | GALNT3  | polypeptide N-acetylgalactosaminyltransferase 3 | 0.54 (0.25, 0.83)    | <0.001 | 1.04 (0.74, 1.35)   | <0.001 |
| <b>Q9Y5W5</b> | WIF1    | WNT inhibitory factor 1                         | 0.54 (0.25, 0.83)    | <0.001 | 1.27 (0.97, 1.58)   | <0.001 |
| <b>P15144</b> | ANPEP   | alanyl aminopeptidase, membrane                 | 0.53 (0.31, 0.76)    | <0.001 | 0.62 (0.36, 0.88)   | <0.001 |
| <b>O00253</b> | AGRP    | agouti related neuropeptide                     | 0.52 (0.28, 0.77)    | <0.001 | 1.00 (0.73, 1.28)   | <0.001 |

## Supplementary

|               |          |                                              |                      |        |                      |        |
|---------------|----------|----------------------------------------------|----------------------|--------|----------------------|--------|
| <b>P36222</b> | CHI3L1   | chitinase 3 like 1                           | 0.52 (0.38, 0.66)    | <0.001 | 0.50 (0.36, 0.64)    | <0.001 |
| <b>P19438</b> | TNFRSF1A | TNF receptor superfamily member 1A           | 0.52 (0.32, 0.71)    | <0.001 | 0.81 (0.60, 1.02)    | <0.001 |
| <b>P50135</b> | HNMT     | histamine N-methyltransferase                | 0.51 (0.31, 0.72)    | <0.001 | 1.10 (0.85, 1.35)    | <0.001 |
| <b>P26022</b> | PTX3     | pentraxin 3                                  | 0.51 (0.28, 0.75)    | <0.001 | 0.96 (0.71, 1.22)    | <0.001 |
| <b>Q9NQ25</b> | SLAMF7   | SLAM family member 7                         | 0.51 (0.31, 0.71)    | <0.001 | 0.65 (0.46, 0.85)    | <0.001 |
| <b>Q9UNE0</b> | EDAR     | ectodysplasin A receptor                     | -0.51 (-0.76, -0.26) | <0.001 | -0.09 (-0.38, 0.20)  | 0.548  |
| <b>P33151</b> | CDH5     | cadherin 5                                   | 0.51 (0.28, 0.74)    | <0.001 | 0.76 (0.49, 1.04)    | <0.001 |
| <b>P08833</b> | IGFBP1   | insulin like growth factor binding protein 1 | 0.51 (0.38, 0.64)    | <0.001 | 0.55 (0.43, 0.66)    | <0.001 |
| <b>Q9NS68</b> | TNFRSF19 | TNF receptor superfamily member 19           | 0.50 (0.31, 0.69)    | <0.001 | 0.78 (0.58, 0.97)    | <0.001 |
| <b>P22004</b> | BMP6     | bone morphogenetic protein 6                 | 0.50 (0.33, 0.67)    | <0.001 | 1.22 (0.91, 1.53)    | <0.001 |
| <b>P13500</b> | CCL2     | C-C motif chemokine ligand 2                 | 0.50 (0.25, 0.75)    | <0.001 | 0.86 (0.56, 1.15)    | <0.001 |
| <b>Q05084</b> | ICA1     | islet cell autoantigen 1                     | -0.50 (-0.76, -0.23) | <0.001 | -0.30 (-0.64, 0.04)  | 0.082  |
| <b>Q13490</b> | BIRC2    | baculoviral IAP repeat containing 2          | -0.50 (-0.88, -0.12) | 0.011  | 0.08 (-0.31, 0.48)   | 0.679  |
| <b>Q8WTT0</b> | CLEC4C   | C-type lectin domain family 4 member C       | -0.50 (-0.74, -0.25) | <0.001 | -0.22 (-0.43, -0.01) | 0.041  |
| <b>P02452</b> | COL1A1   | collagen type I alpha 1 chain                | 0.49 (0.26, 0.72)    | <0.001 | 0.66 (0.41, 0.91)    | <0.001 |

## Supplementary

|               |           |                                                 |                      |        |                      |        |
|---------------|-----------|-------------------------------------------------|----------------------|--------|----------------------|--------|
| <b>P31949</b> | S100A11   | S100 calcium binding protein A11                | 0.49 (0.08, 0.90)    | 0.018  | 1.63 (1.14, 2.13)    | <0.001 |
| <b>P08727</b> | KRT19     | keratin 19                                      | 0.49 (0.29, 0.68)    | <0.001 | 0.43 (0.27, 0.59)    | <0.001 |
| <b>Q9BXY4</b> | RSPO3     | R-spondin 3                                     | 0.48 (0.33, 0.64)    | <0.001 | 0.78 (0.60, 0.96)    | <0.001 |
| <b>P15328</b> | FOLR1     | folate receptor alpha                           | 0.48 (0.23, 0.73)    | <0.001 | 0.84 (0.59, 1.09)    | <0.001 |
| <b>P04085</b> | PDGFA     | platelet derived growth factor subunit A        | -0.48 (-0.62, -0.33) | <0.001 | -0.29 (-0.46, -0.13) | <0.001 |
| <b>Q9Y6Q6</b> | TNFRSF11A | TNF receptor superfamily member 11a             | 0.48 (0.28, 0.67)    | <0.001 | 0.73 (0.52, 0.93)    | <0.001 |
| <b>Q9BXN2</b> | CLEC7A    | C-type lectin domain containing 7A              | 0.47 (0.27, 0.67)    | <0.001 | 0.53 (0.34, 0.73)    | <0.001 |
| <b>P35475</b> | IDUA      | alpha-L-iduronidase                             | -0.47 (-0.76, -0.19) | 0.001  | 0.00 (-0.29, 0.29)   | 0.998  |
| <b>Q15517</b> | CDSN      | corneodesmosin                                  | 0.47 (0.23, 0.71)    | <0.001 | 0.60 (0.39, 0.82)    | <0.001 |
| <b>Q96DB9</b> | FXD5      | FXD domain containing ion transport regulator 5 | -0.47 (-0.81, -0.13) | 0.007  | -0.16 (-0.55, 0.23)  | 0.416  |
| <b>Q99717</b> | SMAD5     | SMAD family member 5                            | -0.47 (-1.20, 0.27)  | 0.213  | -0.89 (-1.72, -0.06) | 0.036  |
| <b>Q96PL1</b> | SCGB3A2   | secretoglobin family 3A member 2                | 0.46 (0.30, 0.62)    | <0.001 | 0.36 (0.24, 0.48)    | <0.001 |
| <b>Q13574</b> | DGKZ      | diacylglycerol kinase zeta                      | -0.46 (-1.10, 0.18)  | 0.157  | 0.02 (-0.54, 0.59)   | 0.932  |
| <b>P28799</b> | GRN       | granulin precursor                              | 0.46 (0.21, 0.71)    | <0.001 | 0.85 (0.53, 1.18)    | <0.001 |
| <b>P35318</b> | ADM       | adrenomedullin                                  | 0.45 (0.26, 0.65)    | <0.001 | 1.09 (0.78, 1.40)    | <0.001 |

## Supplementary

|               |           |                                         |                      |        |                      |        |
|---------------|-----------|-----------------------------------------|----------------------|--------|----------------------|--------|
| <b>O14836</b> | TNFRSF13B | TNF receptor superfamily member 13B     | 0.45 (0.20, 0.71)    | <0.001 | 1.06 (0.78, 1.35)    | <0.001 |
| <b>P80370</b> | DLK1      | delta like non-canonical Notch ligand 1 | 0.45 (0.28, 0.62)    | <0.001 | 0.53 (0.34, 0.71)    | <0.001 |
| <b>P07204</b> | THBD      | thrombomodulin                          | 0.45 (0.16, 0.74)    | 0.002  | 1.14 (0.78, 1.49)    | <0.001 |
| <b>P78325</b> | ADAM8     | ADAM metalloproteinase domain 8         | 0.45 (0.13, 0.76)    | 0.006  | 0.82 (0.48, 1.16)    | <0.001 |
| <b>P21583</b> | KITLG     | KIT ligand                              | -0.44 (-0.66, -0.23) | <0.001 | -0.32 (-0.53, -0.10) | 0.004  |
| <b>P08670</b> | VIM       | vimentin                                | 0.44 (0.21, 0.67)    | <0.001 | 0.95 (0.74, 1.16)    | <0.001 |
| <b>P13598</b> | ICAM2     | intercellular adhesion molecule 2       | 0.43 (0.22, 0.65)    | <0.001 | 0.52 (0.26, 0.78)    | <0.001 |
| <b>P25445</b> | FAS       | Fas cell surface death receptor         | 0.43 (0.20, 0.66)    | <0.001 | 0.81 (0.52, 1.09)    | <0.001 |
| <b>Q12860</b> | CNTN1     | contactin 1                             | 0.43 (0.19, 0.67)    | <0.001 | 0.65 (0.38, 0.93)    | <0.001 |
| <b>Q9Y275</b> | TNFSF13B  | TNF superfamily member 13b              | 0.43 (0.22, 0.63)    | <0.001 | 0.60 (0.39, 0.82)    | <0.001 |
| <b>Q07654</b> | TFF3      | trefoil factor 3                        | 0.43 (0.26, 0.59)    | <0.001 | 0.52 (0.34, 0.70)    | <0.001 |
| <b>P05107</b> | ITGB2     | integrin subunit beta 2                 | 0.42 (0.20, 0.64)    | <0.001 | 0.59 (0.34, 0.85)    | <0.001 |
| <b>Q15389</b> | ANGPT1    | angiopoietin 1                          | -0.42 (-0.56, -0.29) | <0.001 | -0.27 (-0.40, -0.14) | <0.001 |
| <b>P01589</b> | IL2RA     | interleukin 2 receptor subunit alpha    | 0.42 (0.23, 0.62)    | <0.001 | 0.42 (0.21, 0.63)    | <0.001 |
| <b>P56470</b> | LGALS4    | galectin 4                              | 0.42 (0.23, 0.62)    | <0.001 | 0.40 (0.20, 0.59)    | <0.001 |

## Supplementary

|               |         |                                                      |                      |        |                      |        |
|---------------|---------|------------------------------------------------------|----------------------|--------|----------------------|--------|
| <b>Q6UXB2</b> | CXCL17  | C-X-C motif chemokine ligand 17                      | 0.42 (0.20, 0.64)    | <0.001 | 0.50 (0.27, 0.72)    | <0.001 |
| <b>Q16663</b> | CCL15   | C-C motif chemokine ligand 15                        | 0.41 (0.21, 0.61)    | <0.001 | 0.66 (0.43, 0.89)    | <0.001 |
| <b>P10147</b> | CCL3    | C-C motif chemokine ligand 3                         | 0.41 (0.19, 0.63)    | <0.001 | 0.73 (0.52, 0.95)    | <0.001 |
| <b>Q99969</b> | RARRES2 | retinoic acid receptor responder 2                   | -0.41 (-0.67, -0.15) | 0.002  | -0.82 (-1.17, -0.47) | <0.001 |
| <b>P14210</b> | HGF     | hepatocyte growth factor                             | 0.41 (0.25, 0.57)    | <0.001 | 1.00 (0.76, 1.23)    | <0.001 |
| <b>Q9UEW3</b> | MARCO   | macrophage receptor with collagenous structure       | 0.40 (-0.16, 0.96)   | 0.161  | 0.99 (0.36, 1.62)    | 0.002  |
| <b>Q96IQ7</b> | VSIG2   | V-set and immunoglobulin domain containing 2         | 0.40 (0.19, 0.61)    | <0.001 | 0.47 (0.28, 0.66)    | <0.001 |
| <b>P32970</b> | CD70    | CD70 molecule                                        | 0.39 (0.14, 0.65)    | 0.003  | 0.77 (0.50, 1.04)    | <0.001 |
| <b>P25116</b> | F2R     | coagulation factor II thrombin receptor              | 0.39 (0.11, 0.67)    | 0.006  | 0.90 (0.60, 1.21)    | <0.001 |
| <b>Q15109</b> | AGER    | advanced glycosylation end-product specific receptor | 0.39 (0.11, 0.67)    | 0.007  | 1.17 (0.87, 1.46)    | <0.001 |
| <b>Q96NY8</b> | NECTIN4 | nectin cell adhesion molecule 4                      | 0.39 (0.16, 0.63)    | 0.001  | 0.66 (0.43, 0.89)    | <0.001 |
| <b>P01130</b> | LDLR    | low density lipoprotein receptor                     | -0.39 (-0.58, -0.20) | <0.001 | -0.42 (-0.62, -0.22) | <0.001 |
| <b>P21589</b> | NT5E    | 5'-nucleotidase ecto                                 | 0.39 (0.20, 0.58)    | <0.001 | 0.46 (0.28, 0.65)    | <0.001 |
| <b>Q16651</b> | PRSS8   | serine protease 8                                    | 0.39 (0.01, 0.77)    | 0.047  | 0.74 (0.31, 1.17)    | <0.001 |
| <b>P18827</b> | SDC1    | syndecan 1                                           | 0.39 (0.18, 0.59)    | <0.001 | 0.64 (0.43, 0.85)    | <0.001 |

## Supplementary

|               |          |                                                |                      |        |                      |        |
|---------------|----------|------------------------------------------------|----------------------|--------|----------------------|--------|
| <b>Q95971</b> | CD160    | CD160 molecule                                 | 0.39 (0.18, 0.60)    | <0.001 | 0.55 (0.33, 0.76)    | <0.001 |
| <b>P04792</b> | HSPB1    | heat shock protein family B (small) member 1   | -0.38 (-0.72, -0.04) | 0.027  | 0.01 (-0.30, 0.32)   | 0.938  |
| <b>Q9H2A7</b> | CXCL16   | C-X-C motif chemokine ligand 16                | 0.38 (0.14, 0.62)    | 0.002  | 0.44 (0.16, 0.72)    | 0.002  |
| <b>Q9UIB8</b> | CD84     | CD84 molecule                                  | -0.37 (-0.68, -0.07) | 0.016  | 0.07 (-0.26, 0.40)   | 0.683  |
| <b>P01127</b> | PDGFB    | platelet derived growth factor subunit B       | -0.37 (-0.48, -0.26) | <0.001 | -0.28 (-0.38, -0.18) | <0.001 |
| <b>Q6DN72</b> | FCRL6    | Fc receptor like 6                             | 0.36 (0.15, 0.57)    | <0.001 | 0.53 (0.32, 0.74)    | <0.001 |
| <b>O43927</b> | CXCL13   | C-X-C motif chemokine ligand 13                | 0.36 (0.17, 0.54)    | <0.001 | 0.44 (0.28, 0.61)    | <0.001 |
| <b>Q13158</b> | FADD     | Fas associated via death domain                | -0.35 (-0.50, -0.20) | <0.001 | -0.24 (-0.50, 0.02)  | 0.069  |
| <b>Q92876</b> | KLK6     | kallikrein related peptidase 6                 | 0.35 (0.01, 0.69)    | 0.044  | 0.52 (0.25, 0.80)    | <0.001 |
| <b>Q92956</b> | TNFRSF14 | TNF receptor superfamily member 14             | 0.35 (0.17, 0.53)    | <0.001 | 0.70 (0.48, 0.91)    | <0.001 |
| <b>Q01151</b> | CD83     | CD83 molecule                                  | 0.35 (0.07, 0.63)    | 0.015  | 0.79 (0.49, 1.09)    | <0.001 |
| <b>P07948</b> | LYN      | LYN proto-oncogene, Src family tyrosine kinase | -0.33 (-0.49, -0.18) | <0.001 | -0.46 (-0.67, -0.24) | <0.001 |
| <b>P48023</b> | FASLG    | Fas ligand                                     | 0.33 (0.07, 0.59)    | 0.012  | 0.50 (0.23, 0.77)    | <0.001 |
| <b>P22301</b> | IL10     | interleukin 10                                 | 0.33 (0.12, 0.53)    | 0.002  | 0.22 (0.06, 0.37)    | 0.006  |
| <b>P26447</b> | S100A4   | S100 calcium binding protein A4                | -0.33 (-0.59, -0.07) | 0.014  | 0.55 (0.25, 0.86)    | <0.001 |

## Supplementary

|               |         |                                                  |                      |        |                      |        |
|---------------|---------|--------------------------------------------------|----------------------|--------|----------------------|--------|
| <b>P39900</b> | MMP12   | matrix metalloproteinase 12                      | 0.32 (0.16, 0.49)    | <0.001 | 0.41 (0.24, 0.57)    | <0.001 |
| <b>Q96D42</b> | HAVCR1  | hepatitis A virus cellular receptor 1            | 0.32 (0.17, 0.47)    | <0.001 | 0.30 (0.16, 0.44)    | <0.001 |
| <b>P27930</b> | IL1R2   | interleukin 1 receptor type 2                    | 0.32 (0.09, 0.55)    | 0.006  | 0.22 (-0.04, 0.49)   | 0.1    |
| <b>Q13421</b> | MSLN    | mesothelin                                       | 0.32 (0.12, 0.52)    | 0.001  | 0.34 (0.16, 0.52)    | <0.001 |
| <b>P51161</b> | FABP6   | fatty acid binding protein 6                     | 0.32 (0.09, 0.54)    | 0.005  | 0.41 (0.23, 0.59)    | <0.001 |
| <b>P43489</b> | TNFRSF4 | TNF receptor superfamily member 4                | 0.32 (0.09, 0.54)    | 0.005  | 0.62 (0.40, 0.84)    | <0.001 |
| <b>P04080</b> | CSTB    | cystatin B                                       | 0.32 (0.15, 0.48)    | <0.001 | 0.53 (0.35, 0.71)    | <0.001 |
| <b>P48307</b> | TFPI2   | tissue factor pathway inhibitor 2                | 0.31 (0.12, 0.50)    | 0.001  | 0.97 (0.72, 1.21)    | <0.001 |
| <b>P12931</b> | SRC     | SRC proto-oncogene, non-receptor tyrosine kinase | -0.30 (-0.43, -0.18) | <0.001 | -0.44 (-0.58, -0.30) | <0.001 |
| <b>P16278</b> | GLB1    | galactosidase beta 1                             | -0.30 (-0.55, -0.05) | 0.017  | 0.41 (0.00, 0.81)    | 0.047  |
| <b>Q9HD89</b> | RETN    | resistin                                         | 0.30 (0.12, 0.49)    | 0.001  | 0.38 (0.17, 0.60)    | <0.001 |
| <b>O75144</b> | ICOSLG  | inducible T cell costimulator ligand             | 0.30 (-0.09, 0.70)   | 0.136  | 1.69 (1.17, 2.21)    | <0.001 |
| <b>P29965</b> | CD40LG  | CD40 ligand                                      | -0.30 (-0.43, -0.17) | <0.001 | -0.33 (-0.48, -0.19) | <0.001 |
| <b>P01133</b> | EGF     | epidermal growth factor                          | -0.30 (-0.40, -0.20) | <0.001 | -0.37 (-0.48, -0.26) | <0.001 |
| <b>Q9UQV4</b> | LAMP3   | lysosomal associated membrane protein 3          | 0.30 (0.08, 0.52)    | 0.008  | 0.40 (0.18, 0.61)    | <0.001 |

## Supplementary

|               |        |                                             |                      |        |                      |        |
|---------------|--------|---------------------------------------------|----------------------|--------|----------------------|--------|
| <b>Q06830</b> | PRDX1  | peroxiredoxin 1                             | -0.30 (-0.47, -0.12) | <0.001 | 0.83 (0.52, 1.14)    | <0.001 |
| <b>Q04760</b> | GLO1   | glyoxalase I                                | -0.30 (-0.49, -0.10) | 0.003  | 0.31 (0.10, 0.52)    | 0.004  |
| <b>P15086</b> | CPB1   | carboxypeptidase B1                         | 0.29 (0.15, 0.44)    | <0.001 | 0.20 (0.05, 0.35)    | 0.008  |
| <b>P09038</b> | FGF2   | fibroblast growth factor 2                  | -0.29 (-0.46, -0.12) | <0.001 | -0.49 (-0.74, -0.24) | <0.001 |
| <b>P01298</b> | PPY    | pancreatic polypeptide                      | 0.29 (0.16, 0.42)    | <0.001 | 0.22 (0.10, 0.34)    | <0.001 |
| <b>Q9C035</b> | TRIM5  | tripartite motif containing 5               | -0.29 (-0.52, -0.05) | 0.016  | 0.30 (-0.01, 0.60)   | 0.054  |
| <b>P16109</b> | SELP   | selectin P                                  | -0.28 (-0.42, -0.14) | <0.001 | -0.27 (-0.47, -0.07) | 0.008  |
| <b>P09341</b> | CXCL1  | C-X-C motif chemokine ligand 1              | -0.28 (-0.41, -0.16) | <0.001 | -0.06 (-0.20, 0.08)  | 0.402  |
| <b>Q9UK05</b> | GDF2   | growth differentiation factor 2             | -0.28 (-0.49, -0.07) | 0.01   | -0.02 (-0.22, 0.18)  | 0.847  |
| <b>P50579</b> | METAP2 | methionyl aminopeptidase 2                  | -0.27 (-0.46, -0.08) | 0.005  | 0.17 (-0.06, 0.40)   | 0.147  |
| <b>P31994</b> | FCGR2B | Fc gamma receptor IIb                       | 0.27 (0.12, 0.42)    | <0.001 | 0.19 (0.03, 0.34)    | 0.016  |
| <b>Q9GZV9</b> | FGF23  | fibroblast growth factor 23                 | 0.27 (0.18, 0.36)    | <0.001 | 0.30 (0.21, 0.39)    | <0.001 |
| <b>Q13043</b> | STK4   | serine/threonine kinase 4                   | -0.27 (-0.38, -0.16) | <0.001 | -0.39 (-0.52, -0.26) | <0.001 |
| <b>P42574</b> | CASP3  | caspase 3                                   | -0.27 (-0.37, -0.17) | <0.001 | -0.33 (-0.47, -0.19) | <0.001 |
| <b>P63241</b> | EIF5A  | eukaryotic translation initiation factor 5A | 0.27 (-0.14, 0.67)   | 0.194  | 0.34 (0.05, 0.63)    | 0.02   |

## Supplementary

|               |          |                                                          |                      |        |                      |        |
|---------------|----------|----------------------------------------------------------|----------------------|--------|----------------------|--------|
| <b>P35240</b> | NF2      | NF2, moesin-ezrin-radixin like (MERLIN) tumor suppressor | -0.27 (-0.39, -0.15) | <0.001 | -0.32 (-0.50, -0.14) | <0.001 |
| <b>Q92583</b> | CCL17    | C-C motif chemokine ligand 17                            | -0.27 (-0.39, -0.14) | <0.001 | -0.21 (-0.35, -0.07) | 0.003  |
| <b>P30044</b> | PRDX5    | peroxiredoxin 5                                          | -0.26 (-0.41, -0.12) | <0.001 | -0.04 (-0.19, 0.12)  | 0.665  |
| <b>Q16674</b> | MIA      | MIA SH3 domain containing                                | -0.26 (-0.71, 0.18)  | 0.246  | 0.05 (-0.37, 0.46)   | 0.824  |
| <b>Q13241</b> | KLRD1    | killer cell lectin like receptor D1                      | 0.26 (0.04, 0.48)    | 0.02   | 0.42 (0.21, 0.64)    | <0.001 |
| <b>P05121</b> | SERPINE1 | serpin family E member 1                                 | -0.26 (-0.40, -0.12) | <0.001 | -0.12 (-0.24, 0.01)  | 0.06   |
| <b>P23229</b> | ITGA6    | integrin subunit alpha 6                                 | -0.26 (-0.42, -0.10) | 0.002  | 0.01 (-0.33, 0.34)   | 0.975  |
| <b>P15090</b> | FABP4    | fatty acid binding protein 4                             | 0.26 (0.14, 0.37)    | <0.001 | 0.12 (0.00, 0.25)    | 0.049  |
| <b>P08254</b> | MMP3     | matrix metalloproteinase 3                               | 0.25 (0.11, 0.40)    | <0.001 | 0.45 (0.28, 0.61)    | <0.001 |
| <b>Q99523</b> | SORT1    | sortilin 1                                               | -0.25 (-0.62, 0.11)  | 0.174  | 0.30 (-0.15, 0.76)   | 0.186  |
| <b>O43915</b> | VEGFD    | vascular endothelial growth factor D                     | 0.25 (-0.09, 0.59)   | 0.145  | 1.04 (0.68, 1.39)    | <0.001 |
| <b>P19957</b> | PI3      | peptidase inhibitor 3                                    | 0.25 (0.06, 0.44)    | 0.008  | 0.46 (0.29, 0.62)    | <0.001 |
| <b>Q00978</b> | IRF9     | interferon regulatory factor 9                           | -0.25 (-0.48, -0.02) | 0.035  | 0.22 (-0.05, 0.49)   | 0.112  |
| <b>Q12968</b> | NFATC3   | nuclear factor of activated T cells 3                    | 0.24 (0.05, 0.44)    | 0.015  | 0.56 (0.36, 0.76)    | <0.001 |
| <b>P01241</b> | GH1      | growth hormone 1                                         | 0.24 (0.14, 0.34)    | <0.001 | 0.24 (0.15, 0.33)    | <0.001 |

## Supplementary

|               |           |                                                                     |                      |        |                      |        |
|---------------|-----------|---------------------------------------------------------------------|----------------------|--------|----------------------|--------|
| <b>P51617</b> | IRAK1     | interleukin 1 receptor associated kinase 1                          | -0.24 (-0.45, -0.03) | 0.024  | 0.21 (-0.09, 0.50)   | 0.169  |
| <b>P15692</b> | VEGFA     | vascular endothelial growth factor A                                | 0.24 (-0.03, 0.51)   | 0.086  | 0.59 (0.30, 0.88)    | <0.001 |
| <b>P14780</b> | MMP9      | matrix metalloproteinase 9                                          | -0.23 (-0.38, -0.09) | 0.002  | -0.18 (-0.33, -0.03) | 0.022  |
| <b>Q9Y6K9</b> | IKBKG     | inhibitor of nuclear factor kappa B kinase regulatory subunit gamma | -0.23 (-0.38, -0.08) | 0.003  | -0.21 (-0.40, -0.02) | 0.028  |
| <b>O14798</b> | TNFRSF10C | TNF receptor superfamily member 10c                                 | 0.23 (0.03, 0.43)    | 0.021  | 0.29 (0.05, 0.53)    | 0.017  |
| <b>Q6ZUJ8</b> | PIK3AP1   | phosphoinositide-3-kinase adaptor protein 1                         | -0.23 (-0.40, -0.06) | 0.007  | 0.05 (-0.15, 0.26)   | 0.614  |
| <b>P15085</b> | CPA1      | carboxypeptidase A1                                                 | 0.23 (0.09, 0.37)    | 0.001  | 0.14 (0.01, 0.28)    | 0.04   |
| <b>P04626</b> | ERBB2     | erb-b2 receptor tyrosine kinase 2                                   | 0.23 (-0.13, 0.58)   | 0.218  | 1.02 (0.60, 1.43)    | <0.001 |
| <b>Q12933</b> | TRAF2     | TNF receptor associated factor 2                                    | -0.22 (-0.45, 0.01)  | 0.058  | 0.50 (0.22, 0.79)    | <0.001 |
| <b>Q9NWZ3</b> | IRAK4     | interleukin 1 receptor associated kinase 4                          | -0.22 (-0.33, -0.11) | <0.001 | -0.32 (-0.46, -0.18) | <0.001 |
| <b>O00273</b> | DFFA      | DNA fragmentation factor subunit alpha                              | -0.22 (-0.39, -0.05) | 0.012  | 0.31 (0.10, 0.52)    | 0.004  |
| <b>P14317</b> | HCLS1     | hematopoietic cell-specific Lyn substrate 1                         | -0.22 (-0.34, -0.09) | <0.001 | -0.17 (-0.33, -0.01) | 0.041  |
| <b>P02760</b> | AMBP      | alpha-1-microglobulin/bikunin precursor                             | -0.22 (-0.66, 0.23)  | 0.346  | -0.46 (-0.94, 0.03)  | 0.067  |
| <b>Q9UKP3</b> | ITGB1BP2  | integrin subunit beta 1 binding protein 2                           | -0.21 (-0.32, -0.11) | <0.001 | -0.28 (-0.41, -0.15) | <0.001 |
| <b>Q13231</b> | CHIT1     | chitinase 1                                                         | 0.21 (0.10, 0.32)    | <0.001 | 0.23 (0.12, 0.35)    | <0.001 |

## Supplementary

|               |        |                                              |                      |        |                      |        |
|---------------|--------|----------------------------------------------|----------------------|--------|----------------------|--------|
| <b>Q94992</b> | HEXIM1 | HEXIM P-TEFb complex subunit 1               | -0.21 (-0.35, -0.06) | 0.005  | -0.12 (-0.29, 0.06)  | 0.186  |
| <b>P16860</b> | NPPB   | natriuretic peptide B                        | 0.21 (0.12, 0.30)    | <0.001 | 0.29 (0.22, 0.37)    | <0.001 |
| <b>Q15166</b> | PON3   | paraoxonase 3                                | -0.21 (-0.36, -0.05) | 0.008  | -0.26 (-0.42, -0.09) | 0.002  |
| <b>P16581</b> | SELE   | selectin E                                   | 0.20 (-0.00, 0.40)   | 0.053  | -0.02 (-0.22, 0.19)  | 0.885  |
| <b>P10144</b> | GZMB   | granzyme B                                   | 0.20 (-0.01, 0.41)   | 0.06   | 0.46 (0.23, 0.70)    | <0.001 |
| <b>O15455</b> | TLR3   | toll like receptor 3                         | 0.20 (-0.03, 0.42)   | 0.085  | 0.35 (0.14, 0.56)    | 0.001  |
| <b>Q92844</b> | TANK   | TRAF family member associated NFKB activator | -0.20 (-0.40, 0.01)  | 0.06   | -0.33 (-0.58, -0.08) | 0.009  |
| <b>Q9UQQ2</b> | SH2B3  | SH2B adaptor protein 3                       | -0.19 (-0.31, -0.08) | <0.001 | -0.37 (-0.52, -0.23) | <0.001 |
| <b>Q05516</b> | ZBTB16 | zinc finger and BTB domain containing 16     | -0.19 (-0.35, -0.03) | 0.017  | -0.24 (-0.43, -0.04) | 0.016  |
| <b>Q14005</b> | IL16   | interleukin 16                               | 0.19 (-0.03, 0.40)   | 0.091  | 0.79 (0.53, 1.06)    | <0.001 |
| <b>P16455</b> | MGMT   | O-6-methylguanine-DNA methyltransferase      | -0.18 (-0.30, -0.07) | 0.001  | -0.07 (-0.19, 0.05)  | 0.271  |
| <b>P38936</b> | CDKN1A | cyclin dependent kinase inhibitor 1A         | -0.18 (-0.30, -0.06) | 0.003  | -0.16 (-0.31, -0.01) | 0.033  |
| <b>Q9HCM2</b> | PLXNA4 | plexin A4                                    | -0.18 (-0.31, -0.05) | 0.005  | -0.43 (-0.58, -0.28) | <0.001 |
| <b>O00626</b> | CCL22  | C-C motif chemokine ligand 22                | -0.18 (-0.34, -0.02) | 0.031  | -0.01 (-0.15, 0.12)  | 0.835  |
| <b>P56279</b> | TCL1A  | TCL1 family AKT coactivator A                | -0.18 (-0.30, -0.06) | 0.003  | -0.16 (-0.28, -0.05) | 0.005  |

## Supplementary

|               |          |                                                           |                      |        |                      |        |
|---------------|----------|-----------------------------------------------------------|----------------------|--------|----------------------|--------|
| <b>P20718</b> | GZMH     | granzyme H                                                | 0.17 (0.03, 0.32)    | 0.017  | 0.63 (0.44, 0.81)    | <0.001 |
| <b>P78362</b> | SRPK2    | SRSF protein kinase 2                                     | -0.17 (-0.29, -0.05) | 0.006  | -0.04 (-0.21, 0.13)  | 0.63   |
| <b>Q9NQ76</b> | MEPE     | matrix extracellular phosphoglycoprotein                  | 0.17 (-0.04, 0.39)   | 0.118  | 0.39 (0.16, 0.62)    | 0.001  |
| <b>Q9UKX5</b> | ITGA11   | integrin subunit alpha 11                                 | 0.17 (-0.12, 0.46)   | 0.257  | 0.75 (0.45, 1.05)    | <0.001 |
| <b>Q13867</b> | BLMH     | bleomycin hydrolase                                       | 0.17 (-0.06, 0.40)   | 0.144  | 0.54 (0.27, 0.81)    | <0.001 |
| <b>Q14116</b> | IL18     | interleukin 18                                            | 0.17 (-0.06, 0.39)   | 0.141  | 0.38 (0.14, 0.61)    | 0.002  |
| <b>P27540</b> | ARNT     | aryl hydrocarbon receptor nuclear translocator            | 0.16 (0.03, 0.30)    | 0.02   | 0.11 (-0.04, 0.27)   | 0.14   |
| <b>P40222</b> | TXLNA    | taxilin alpha                                             | -0.16 (-0.30, -0.03) | 0.016  | -0.19 (-0.34, -0.04) | 0.016  |
| <b>Q9HB29</b> | IL1RL2   | interleukin 1 receptor like 2                             | -0.16 (-0.45, 0.13)  | 0.272  | 0.24 (-0.08, 0.56)   | 0.137  |
| <b>P35247</b> | SFTPD    | surfactant protein D                                      | 0.16 (-0.03, 0.35)   | 0.107  | 0.20 (0.04, 0.37)    | 0.016  |
| <b>Q96F46</b> | IL17RA   | interleukin 17 receptor A                                 | 0.16 (-0.05, 0.37)   | 0.144  | 0.53 (0.28, 0.79)    | <0.001 |
| <b>Q8WXI7</b> | MUC16    | mucin 16, cell surface associated                         | 0.16 (0.06, 0.25)    | <0.001 | 0.21 (0.13, 0.30)    | <0.001 |
| <b>Q8TE58</b> | ADAMTS15 | ADAM metallopeptidase with thrombospondin type 1 motif 15 | 0.16 (-0.05, 0.37)   | 0.143  | 0.24 (-0.05, 0.53)   | 0.102  |
| <b>P13688</b> | CEACAM1  | CEA cell adhesion molecule 1                              | 0.16 (-0.57, 0.88)   | 0.672  | 0.95 (0.10, 1.80)    | 0.028  |
| <b>Q9UN19</b> | DAPP1    | dual adaptor of phosphotyrosine and 3-phosphoinositides 1 | -0.15 (-0.22, -0.08) | <0.001 | -0.29 (-0.39, -0.20) | <0.001 |

## Supplementary

|               |         |                                                       |                      |       |                      |        |
|---------------|---------|-------------------------------------------------------|----------------------|-------|----------------------|--------|
| <b>Q96SB3</b> | PPP1R9B | protein phosphatase 1 regulatory subunit 9B           | -0.15 (-0.26, -0.04) | 0.009 | -0.42 (-0.57, -0.26) | <0.001 |
| <b>Q04637</b> | EIF4G1  | eukaryotic translation initiation factor 4 gamma 1    | -0.14 (-0.26, -0.03) | 0.014 | -0.14 (-0.28, -0.00) | 0.049  |
| <b>P78380</b> | OLR1    | oxidized low density lipoprotein receptor 1           | -0.14 (-0.34, 0.05)  | 0.147 | 0.39 (0.15, 0.63)    | 0.002  |
| <b>P41159</b> | LEP     | leptin                                                | -0.14 (-0.25, -0.03) | 0.014 | -0.35 (-0.46, -0.25) | <0.001 |
| <b>P10646</b> | TFPI    | tissue factor pathway inhibitor                       | -0.14 (-0.35, 0.07)  | 0.19  | 0.02 (-0.26, 0.31)   | 0.877  |
| <b>P35218</b> | CA5A    | carbonic anhydrase 5A                                 | 0.13 (0.00, 0.26)    | 0.047 | 0.44 (0.31, 0.57)    | <0.001 |
| <b>P05412</b> | JUN     | Jun proto-oncogene, AP-1 transcription factor subunit | 0.13 (-0.14, 0.40)   | 0.336 | 0.20 (0.00, 0.39)    | 0.049  |
| <b>Q8IU57</b> | IFNLR1  | interferon lambda receptor 1                          | -0.13 (-0.50, 0.23)  | 0.48  | 0.32 (-0.05, 0.69)   | 0.088  |
| <b>O94907</b> | DKK1    | dickkopf WNT signaling pathway inhibitor 1            | -0.13 (-0.31, 0.05)  | 0.153 | 0.48 (0.28, 0.67)    | <0.001 |
| <b>P04083</b> | ANXA1   | annexin A1                                            | -0.13 (-0.35, 0.09)  | 0.243 | 0.53 (0.27, 0.79)    | <0.001 |
| <b>Q14512</b> | FGFBP1  | fibroblast growth factor binding protein 1            | 0.13 (0.00, 0.26)    | 0.049 | 0.46 (0.30, 0.62)    | <0.001 |
| <b>O43597</b> | SPRY2   | sprouty RTK signaling antagonist 2                    | -0.13 (-0.24, -0.01) | 0.031 | -0.28 (-0.43, -0.12) | <0.001 |
| <b>Q9Y624</b> | F11R    | F11 receptor                                          | -0.13 (-0.25, -0.00) | 0.044 | 0.20 (0.02, 0.38)    | 0.031  |
| <b>Q16698</b> | DECR1   | 2,4-dienoyl-CoA reductase 1                           | -0.13 (-0.24, -0.01) | 0.028 | -0.02 (-0.14, 0.10)  | 0.756  |
| <b>P21741</b> | MDK     | midkine                                               | 0.13 (-0.02, 0.27)   | 0.08  | 0.42 (0.26, 0.58)    | <0.001 |

## Supplementary

|               |         |                                        |                     |       |                      |        |
|---------------|---------|----------------------------------------|---------------------|-------|----------------------|--------|
| <b>Q14203</b> | DCTN1   | dynactin subunit 1                     | -0.13 (-0.26, 0.01) | 0.065 | -0.03 (-0.23, 0.17)  | 0.758  |
| <b>O14867</b> | BACH1   | BTB domain and CNC homolog 1           | -0.13 (-0.37, 0.12) | 0.325 | 0.03 (-0.26, 0.32)   | 0.835  |
| <b>O75594</b> | PGLYRP1 | peptidoglycan recognition protein 1    | 0.12 (-0.06, 0.30)  | 0.18  | 0.17 (-0.05, 0.38)   | 0.126  |
| <b>Q8WXI8</b> | CLEC4D  | C-type lectin domain family 4 member D | 0.12 (-0.07, 0.31)  | 0.206 | 0.27 (0.10, 0.45)    | 0.002  |
| <b>P09874</b> | PARP1   | poly(ADP-ribose) polymerase 1          | -0.11 (-0.28, 0.05) | 0.17  | 0.79 (0.53, 1.04)    | <0.001 |
| <b>O60259</b> | KLK8    | kallikrein related peptidase 8         | 0.11 (-0.20, 0.43)  | 0.485 | 0.70 (0.40, 0.99)    | <0.001 |
| <b>P00533</b> | EGFR    | epidermal growth factor receptor       | -0.11 (-0.42, 0.19) | 0.473 | -0.36 (-0.72, -0.00) | 0.049  |
| <b>P09382</b> | LGALS1  | galectin 1                             | -0.11 (-0.63, 0.41) | 0.673 | 0.74 (0.14, 1.33)    | 0.015  |
| <b>P00797</b> | REN     | renin                                  | 0.11 (-0.04, 0.26)  | 0.159 | 0.00 (-0.15, 0.16)   | 0.963  |
| <b>P28845</b> | HSD11B1 | hydroxysteroid 11-beta dehydrogenase 1 | 0.11 (-0.22, 0.43)  | 0.509 | 0.53 (0.23, 0.83)    | <0.001 |
| <b>P04275</b> | VWF     | von Willebrand factor                  | 0.11 (-0.01, 0.22)  | 0.062 | 0.11 (-0.01, 0.23)   | 0.083  |
| <b>Q9NSA1</b> | FGF21   | fibroblast growth factor 21            | 0.11 (0.02, 0.20)   | 0.023 | 0.18 (0.10, 0.26)    | <0.001 |
| <b>P27352</b> | CBLIF   | cobalamin binding intrinsic factor     | -0.11 (-0.24, 0.03) | 0.128 | -0.03 (-0.14, 0.08)  | 0.535  |
| <b>P24158</b> | PRTN3   | proteinase 3                           | 0.10 (-0.09, 0.29)  | 0.29  | 0.44 (0.22, 0.65)    | <0.001 |
| <b>P09237</b> | MMP7    | matrix metalloproteinase 7             | 0.10 (-0.08, 0.29)  | 0.281 | 0.31 (0.01, 0.61)    | 0.043  |

## Supplementary

|               |         |                                                   |                     |       |                      |        |
|---------------|---------|---------------------------------------------------|---------------------|-------|----------------------|--------|
| <b>P06731</b> | CEACAM5 | CEA cell adhesion molecule 5                      | 0.10 (-0.09, 0.29)  | 0.297 | 0.17 (0.01, 0.33)    | 0.036  |
| <b>P16284</b> | PECAM1  | platelet and endothelial cell adhesion molecule 1 | -0.10 (-0.25, 0.05) | 0.206 | 0.15 (-0.09, 0.38)   | 0.222  |
| <b>O14828</b> | SCAMP3  | secretory carrier membrane protein 3              | -0.10 (-0.22, 0.02) | 0.118 | -0.23 (-0.37, -0.09) | 0.001  |
| <b>Q04759</b> | PRKCQ   | protein kinase C theta                            | -0.10 (-0.37, 0.18) | 0.497 | 0.01 (-0.28, 0.31)   | 0.926  |
| <b>P20160</b> | AZU1    | azurocidin 1                                      | -0.10 (-0.26, 0.07) | 0.26  | 0.35 (0.13, 0.57)    | 0.002  |
| <b>P34130</b> | NTF4    | neurotrophin 4                                    | 0.10 (-0.24, 0.43)  | 0.572 | 0.73 (0.41, 1.05)    | <0.001 |
| <b>P00750</b> | PLAT    | plasminogen activator, tissue type                | 0.10 (-0.01, 0.21)  | 0.09  | 0.29 (0.17, 0.41)    | <0.001 |
| <b>P17931</b> | LGALS3  | galectin 3                                        | 0.09 (-0.13, 0.32)  | 0.41  | 0.03 (-0.25, 0.31)   | 0.841  |
| <b>P19474</b> | TRIM21  | tripartite motif containing 21                    | -0.09 (-0.27, 0.08) | 0.296 | 0.52 (0.28, 0.75)    | <0.001 |
| <b>Q9NPY3</b> | CD93    | CD93 molecule                                     | 0.09 (-0.13, 0.31)  | 0.417 | 0.19 (-0.07, 0.45)   | 0.15   |
| <b>P30048</b> | PRDX3   | peroxiredoxin 3                                   | -0.09 (-0.27, 0.10) | 0.352 | 0.30 (0.09, 0.51)    | 0.005  |
| <b>O15467</b> | CCL16   | C-C motif chemokine ligand 16                     | 0.08 (-0.10, 0.27)  | 0.369 | -0.10 (-0.31, 0.10)  | 0.314  |
| <b>Q03431</b> | PTH1R   | parathyroid hormone 1 receptor                    | -0.08 (-0.32, 0.17) | 0.531 | -0.28 (-0.60, 0.04)  | 0.092  |
| <b>O95786</b> | RIGI    | RNA sensor RIG-I                                  | -0.08 (-0.25, 0.10) | 0.391 | 0.42 (0.17, 0.67)    | 0.001  |
| <b>P18510</b> | IL1RN   | interleukin 1 receptor antagonist                 | -0.08 (-0.25, 0.10) | 0.396 | -0.10 (-0.27, 0.07)  | 0.261  |

## Supplementary

|               |        |                                                    |                     |       |                      |        |
|---------------|--------|----------------------------------------------------|---------------------|-------|----------------------|--------|
| <b>P13686</b> | ACP5   | acid phosphatase 5, tartrate resistant             | -0.07 (-0.29, 0.15) | 0.532 | -0.21 (-0.47, 0.05)  | 0.114  |
| <b>O75475</b> | PSIP1  | PC4 and SRSF1 interacting protein 1                | -0.07 (-0.22, 0.08) | 0.372 | 0.43 (0.24, 0.61)    | <0.001 |
| <b>Q8NBP7</b> | PCSK9  | proprotein convertase subtilisin/kexin type 9      | -0.07 (-0.34, 0.20) | 0.619 | -0.36 (-0.66, -0.05) | 0.021  |
| <b>Q9UKR3</b> | KLK13  | kallikrein related peptidase 13                    | -0.07 (-0.40, 0.27) | 0.69  | 0.12 (-0.13, 0.37)   | 0.348  |
| <b>P52294</b> | KPNA1  | karyopherin subunit alpha 1                        | 0.06 (-0.11, 0.24)  | 0.474 | 0.10 (-0.02, 0.23)   | 0.109  |
| <b>Q9UBG3</b> | CRNN   | cornulin                                           | 0.06 (-0.11, 0.24)  | 0.475 | -0.08 (-0.23, 0.06)  | 0.259  |
| <b>Q9P0G3</b> | KLK14  | kallikrein related peptidase 14                    | 0.06 (-0.18, 0.31)  | 0.604 | 0.46 (0.23, 0.70)    | <0.001 |
| <b>O60880</b> | SH2D1A | SH2 domain containing 1A                           | -0.06 (-0.26, 0.13) | 0.525 | 0.39 (0.14, 0.64)    | 0.002  |
| <b>Q29983</b> | MICA   | MHC class I polypeptide-related sequence A         | -0.06 (-0.17, 0.05) | 0.278 | -0.06 (-0.17, 0.05)  | 0.301  |
| <b>P05113</b> | IL5    | interleukin 5                                      | 0.05 (-0.09, 0.20)  | 0.457 | 0.09 (-0.04, 0.21)   | 0.164  |
| <b>P00519</b> | ABL1   | ABL proto-oncogene 1, non-receptor tyrosine kinase | -0.05 (-0.21, 0.11) | 0.515 | 0.33 (0.12, 0.54)    | 0.002  |
| <b>Q02763</b> | TEK    | TEK receptor tyrosine kinase                       | 0.05 (-0.36, 0.46)  | 0.804 | 1.34 (0.81, 1.87)    | <0.001 |
| <b>P12104</b> | FABP2  | fatty acid binding protein 2                       | 0.05 (-0.11, 0.21)  | 0.551 | 0.09 (-0.06, 0.24)   | 0.225  |
| <b>P21980</b> | TGM2   | transglutaminase 2                                 | -0.04 (-0.25, 0.16) | 0.669 | 0.45 (0.22, 0.68)    | <0.001 |
| <b>O00175</b> | CCL24  | C-C motif chemokine ligand 24                      | 0.04 (-0.10, 0.18)  | 0.538 | 0.06 (-0.08, 0.20)   | 0.415  |

## Supplementary

|               |           |                                                       |                     |       |                     |        |
|---------------|-----------|-------------------------------------------------------|---------------------|-------|---------------------|--------|
| <b>Q9UJM8</b> | HAO1      | hydroxyacid oxidase 1                                 | 0.04 (-0.05, 0.14)  | 0.369 | 0.19 (0.11, 0.28)   | <0.001 |
| <b>Q5T2D2</b> | TREML2    | triggering receptor expressed on myeloid cells like 2 | -0.04 (-0.24, 0.15) | 0.673 | -0.04 (-0.27, 0.20) | 0.768  |
| <b>P31997</b> | CEACAM8   | CEA cell adhesion molecule 8                          | 0.04 (-0.13, 0.21)  | 0.639 | 0.26 (0.06, 0.46)   | 0.012  |
| <b>Q99895</b> | CTRC      | chymotrypsin C                                        | 0.04 (-0.11, 0.19)  | 0.589 | -0.00 (-0.14, 0.13) | 0.96   |
| <b>Q8IW75</b> | SERPINA12 | serpin family A member 12                             | 0.04 (-0.10, 0.19)  | 0.581 | 0.04 (-0.11, 0.19)  | 0.583  |
| <b>P16422</b> | EPCAM     | epithelial cell adhesion molecule                     | 0.04 (-0.12, 0.20)  | 0.655 | -0.02 (-0.17, 0.12) | 0.746  |
| <b>Q9GZT9</b> | EGLN1     | egl-9 family hypoxia inducible factor 1               | -0.04 (-0.32, 0.25) | 0.805 | 0.87 (0.54, 1.19)   | <0.001 |
| <b>Q9BQR3</b> | PRSS27    | serine protease 27                                    | 0.03 (-0.24, 0.30)  | 0.809 | 0.47 (0.21, 0.74)   | <0.001 |
| <b>O43895</b> | XPNPEP2   | X-prolyl aminopeptidase 2                             | -0.03 (-0.21, 0.15) | 0.754 | 0.10 (-0.06, 0.26)  | 0.214  |
| <b>Q15661</b> | TPSAB1    | tryptase alpha/beta 1                                 | 0.03 (-0.22, 0.28)  | 0.824 | 0.20 (-0.05, 0.45)  | 0.121  |
| <b>P08887</b> | IL6R      | interleukin 6 receptor                                | 0.02 (-0.21, 0.26)  | 0.835 | -0.06 (-0.34, 0.22) | 0.686  |
| <b>Q9Y2J8</b> | PADI2     | peptidyl arginine deiminase 2                         | -0.02 (-0.27, 0.23) | 0.849 | 0.33 (0.07, 0.59)   | 0.012  |
| <b>P41439</b> | FOLR3     | folate receptor gamma                                 | -0.02 (-0.10, 0.07) | 0.686 | -0.01 (-0.10, 0.07) | 0.761  |
| <b>O95274</b> | LYPD3     | LY6/PLAUR domain containing 3                         | 0.01 (-0.33, 0.36)  | 0.934 | 0.35 (0.04, 0.65)   | 0.027  |
| <b>Q9UJ71</b> | CD207     | CD207 molecule                                        | 0.01 (-0.32, 0.34)  | 0.941 | 0.43 (0.16, 0.70)   | 0.002  |

Supplementary

---

|               |       |                               |                       |      |                   |       |
|---------------|-------|-------------------------------|-----------------------|------|-------------------|-------|
| <b>P51671</b> | CCL11 | C-C motif chemokine ligand 11 | 0.00 (-0.27,<br>0.28) | 0.99 | 0.45 (0.16, 0.74) | 0.002 |
|---------------|-------|-------------------------------|-----------------------|------|-------------------|-------|

---

66  
67

Supplementary
